# Supplementary material for: Microscopic polyangiitis plasma-derived exosomal miR-1287-5p induces endothelial inflammatory injury and neutrophil adhesion by targeting CBL
Source: PeerJ journal article supplement (doi:10.7717/peerj.14579), 2023-01-27

Picture 1

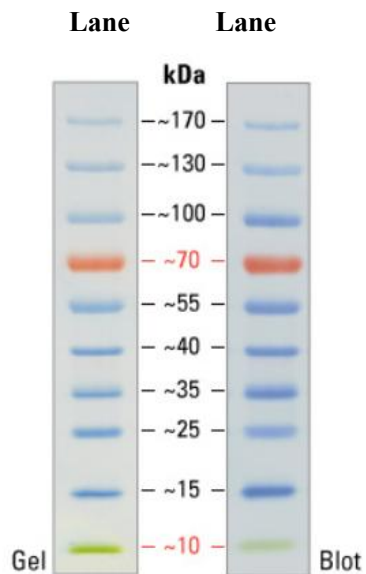

Picture 2

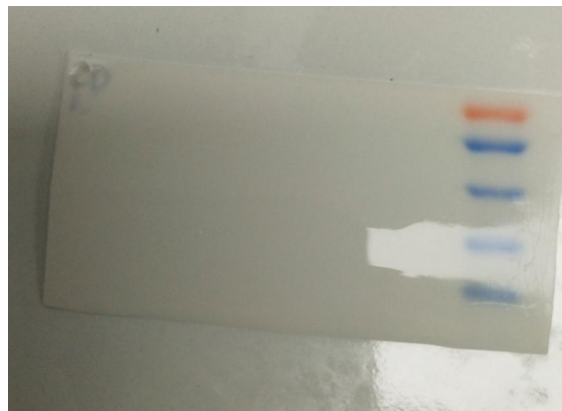

Picture 3

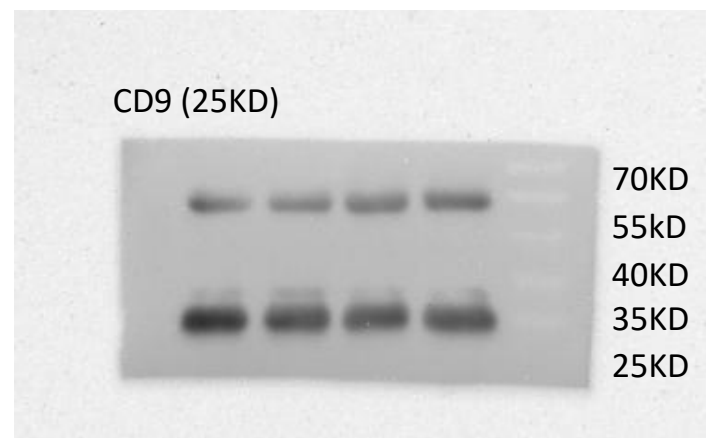

Lane 1 is the schematic diagram of the marker we selected (Thermo), and we found that the marker at the 70kD position is red. Picture 2 is a PVDF membrane incubated with CD9, picture 3 is the picture of the western blot. The top red brand in picture 2 is 70kD, and we found the molecular weight of CD9 is 25kD.

CBL (120KD)

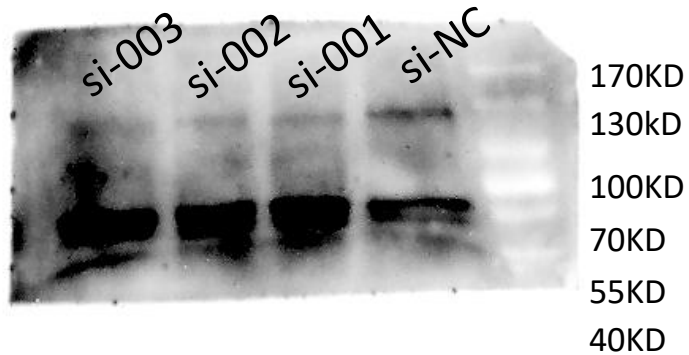

$\beta$ -tublin (55KD)

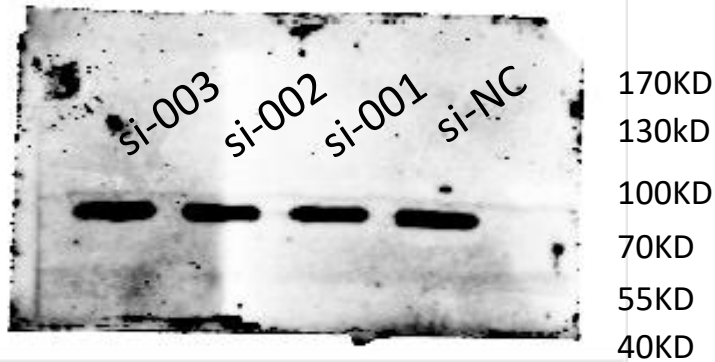

## Exosome marker protein

CD9 (25KD)

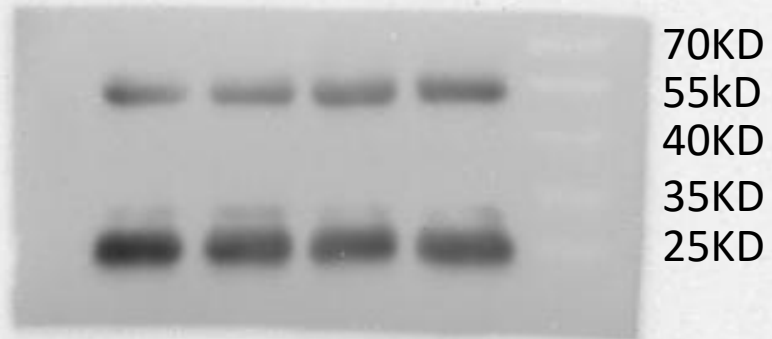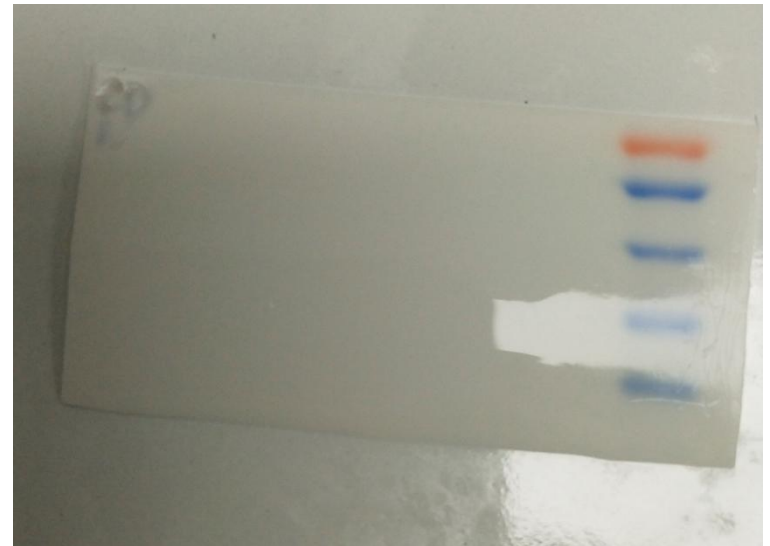

CD63 (26KD)

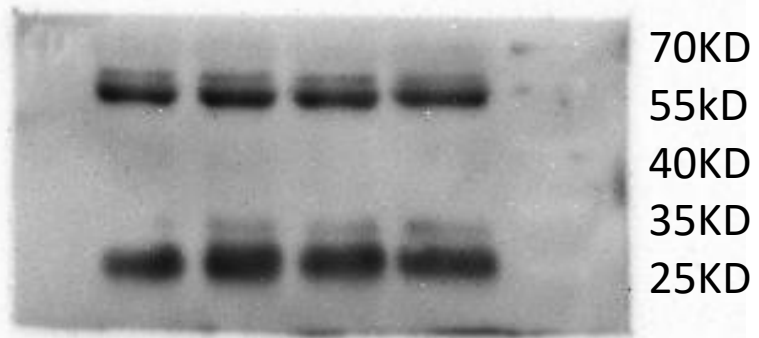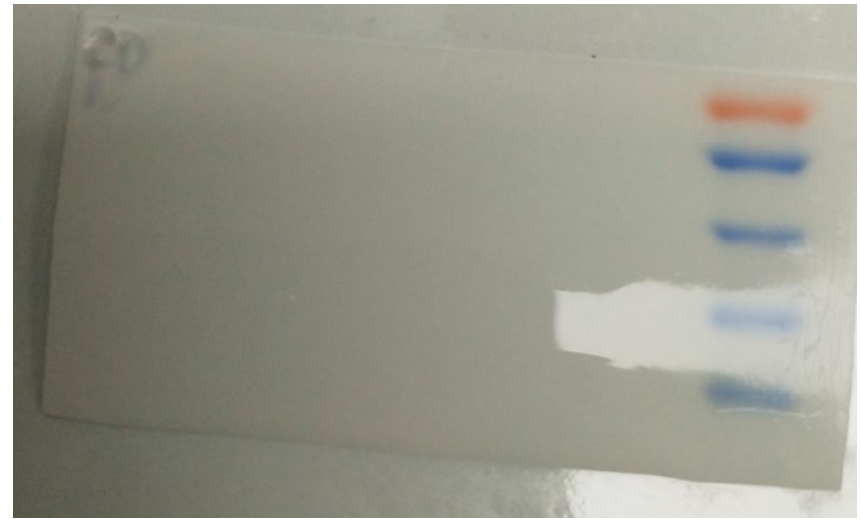

TSG101 (44KD)

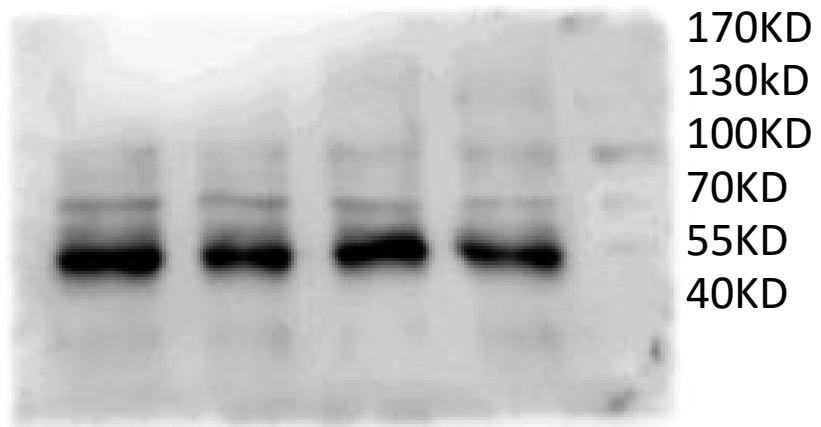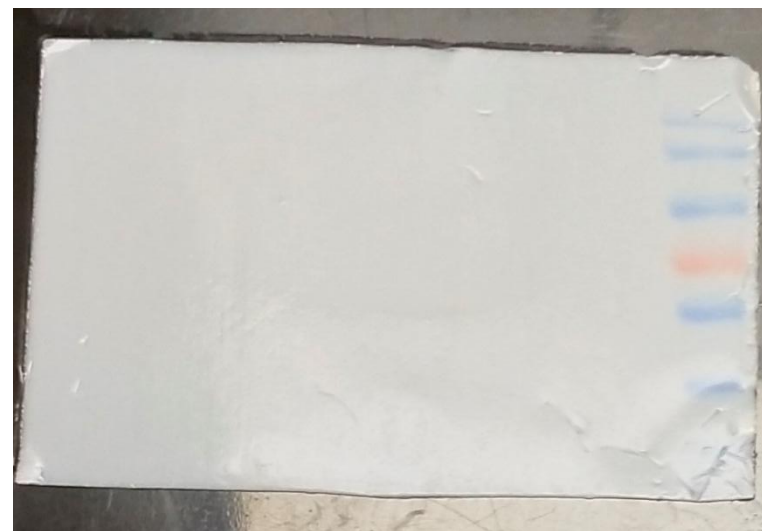

CBL (120KD)

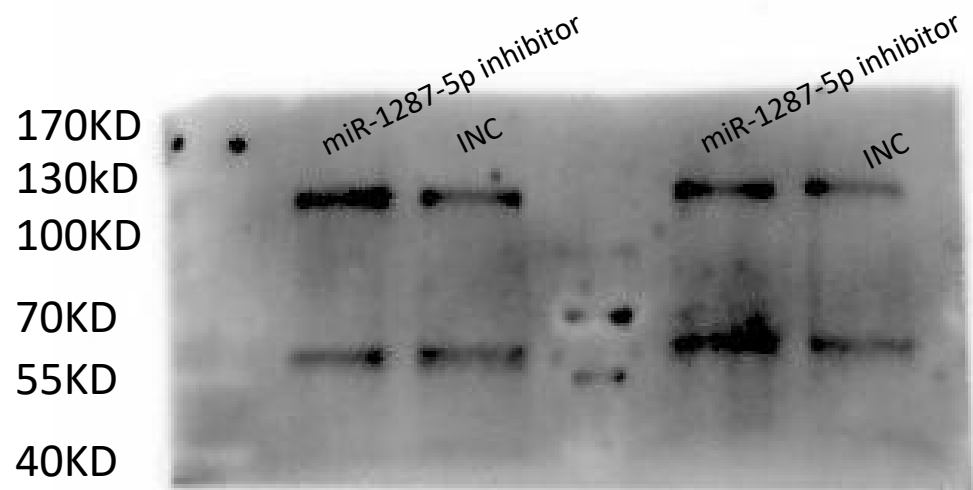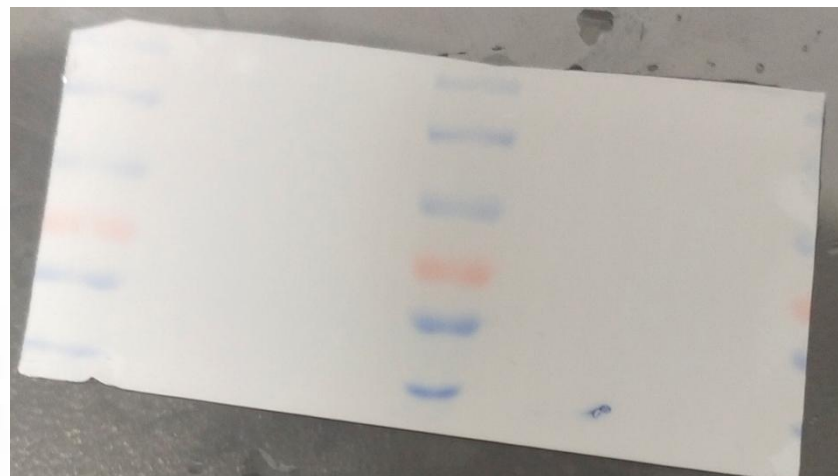

$\beta$ -tubulin (55KD)

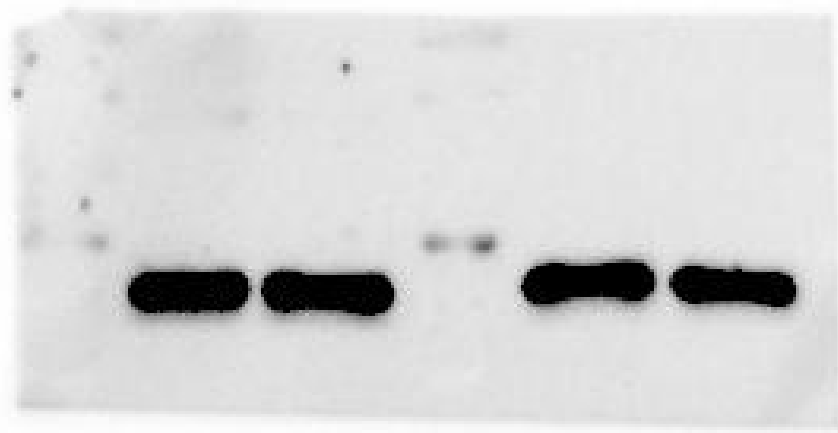

CBL (120KD)

170KD  
130kD  
100KD

70KD  
55KD  
40KD

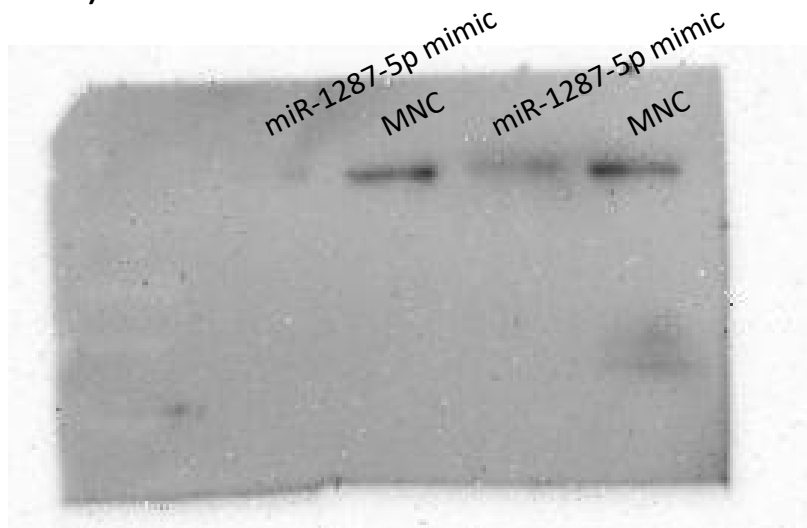

$\beta$ -tublin (55KD)

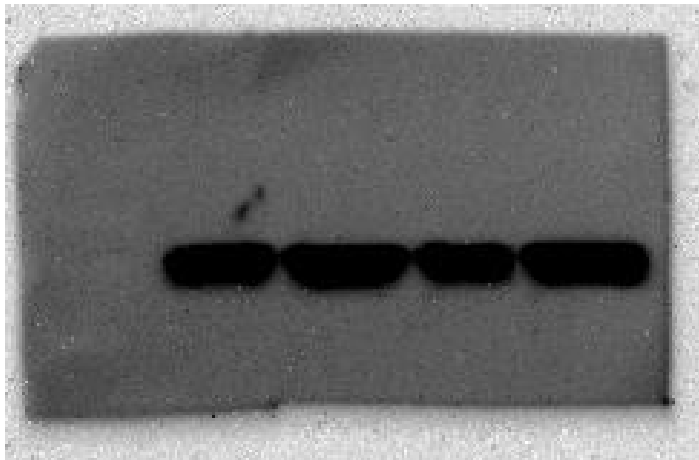

CBL (120KD)

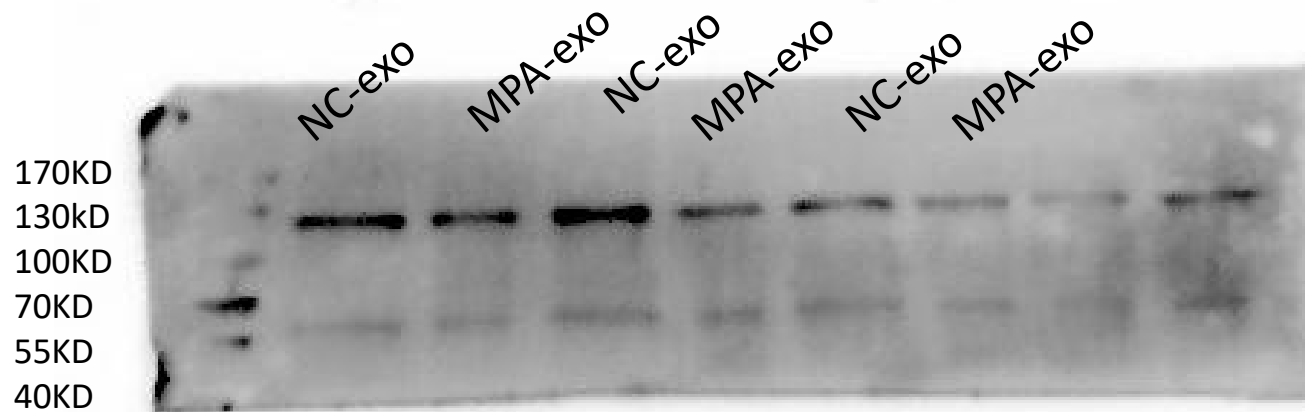

$\beta$ -tublin (55KD)

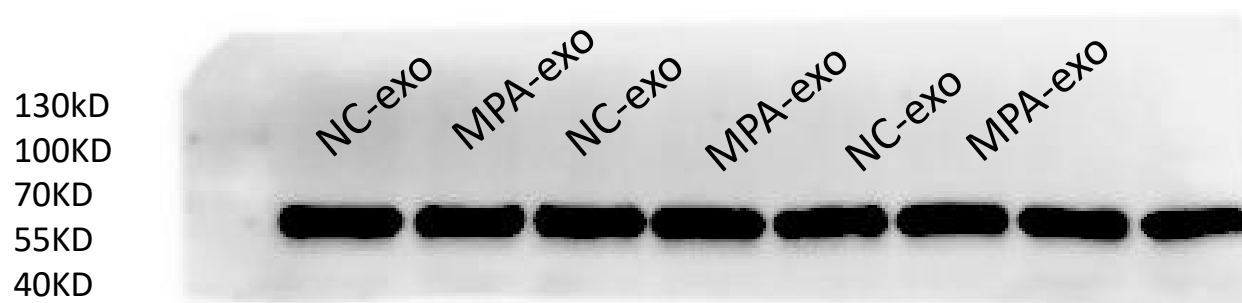

Supplement: supplemental_file_2.pdf [file supplemental_file_2.pdf]
