# Supplementary material for: Microscopic polyangiitis plasma-derived exosomal miR-1287-5p induces endothelial inflammatory injury and neutrophil adhesion by targeting CBL
Source: PeerJ. 2023 Jan 27;11:e14579. doi: 10.7717/peerj.14579 (PMC9885867; doi:10.7717/peerj.14579)
Supplement: Supplemental Information 1 [file peerj-11-14579-s001.xlsx]

## Sheet: PCR
1. MPA derived exosome cultured with HUVECs， the mRNA expression of inflammatory factor and adheision molecular, all result was used "independent sample t test"
IL-6					IL-8				MCP-1				ICAM-1				E-selectin
		HC-exo	MPA-exo			HC-exo	MPA-exo			HC-exo	MPA-exo			HC-exo	MPA-exo			HC-exo	MPA-exo
1		1.22673	1.35		1	1.09637	1.78		1	0.800613	2.49		1	1.09933	1.34		1	1.05877	2.43
2		0.864019	1.57		2	1.11296	1.99		2	1.41593	1.63		2	1.0532	1.72		2	1.01161	1.44
3		0.909249	1.39		3	0.790664	1.7		3	0.783452	2.1		3	0.847471	1.46		3	0.929617	1.72
effect size		1(0.2)	1.437(1.12)		effect size	1.00(0.18)	1.82(0.15)		effect size	1(0.36)	2.07(0.43)		effect size	1(0.13)	1.81(0.19)		effect size	1(0.65)	1.86(0.51)
t		-3.254			t	-6.06			t	-3.311			t	-3.718			t	-2.906
df		4			df	4			df	4			df	4			df	4
p		0.031			p	0.004			p	0.03			p	0.21			p	0.044
2. The expression profiles of the selected three differential exosomal miRNAs were validated by qRT-PCR,all result was used "independent sample t test"
miR-1303					miR-1287-5p				miR-129-1-3p
		HC-exo	MPA-exo			HC-exo	MPA-exo			HC-exo	MPA-exo
1		1.0019	1.29		1	0.900664	3.99		1	0.804633	0.008
2		0.984666	1.07		2	0.774308	3.89		2	1.13569	0.04
3		0.995332	1.411		3	0.672277	3.097		3	1.13178	0.03
4		0.900097	1.341		4	1.1681	5.74		4	0.809942	0.28
5		0.94459	1.383		5	1.1468	5.963		5	0.967739	0.035
6		1.17341	0.91		6	1.33785	1.7		6	1.15022	0.063
effect size		1(0.09)	1.23(0.20)		effect size	1.0(0.26)	4.06(1.61)		effect size	1(0.16)	0.076(0.10)
t		-4.6			t	-4.6			t	11.761
df		5.256			df	5.256			df	10
p		0.005			p	0.005			p	=0.000
3. MiR-1287-5p expression of HUVECs after treated with MPA-exo for 24 hours,all result was used "independent sample t test"
miR-1287-5p
		HC-exo	MPA-exo
1		0.972943	1.37
2		0.881541	1.36
3		1.14552	1.515
effect size		1(0.13)	1.42(0.09)
t		-4.502
df		4
p		0.011
4. HUVECs treated with miR-1287-5p mimics, inhibitor, and NC for 24 hours, the inflammatory factors and adhesion molecules, all result was used "independent sample t test"
IL-6							IL-8						MCP-1						ICAM-1						E-selectin
		MN	mimic	IN	inhibitor			MN	mimic	IN	inhibitor			MN	mimic	IN	inhibitor			MN	mimic	IN	inhibitor			MN	mimic	IN	inhibitor
1		0.868291	2.47	1.09147	0.719		1	0.900201	1.99	0.897997	0.257		1	0.892009	2.88	0.833534	0.328		1	0.97162	2.68	1.05131	0.48		1	0.995591	1.21	0.964922	0.34
2		0.859536	2.46	0.875769	0.521		2	1.07289	2.432	0.93606	0.255		2	1.0029	1.58	0.926206	0.144		2	0.871851	1.87	0.898783	0.47		2	0.968573	1.17	0.997308	0.14
3		1.27217	1.925	1.03276	0.257		3	1.0269	1.557	1.16594	0.582		3	1.10509	3.036	1.24026	0.462		3	1.15653	2.52	1.0499	0.63		3	1.03584	1.14	1.03777	0.31
effect size		1(0.24)	2.29(0.31)	1(0.11)	0.50(0.23)		effect size	1(0.09)	1.99(0.44)	1(0.14)	0.36(0.19)		effect size	1(0.11)	2.50(0.80)	1(0.21)	0.31(0.16)		effect size	1(0.14)	2.36(0.43)	1(0.09)	0.53(0.09)		effect size	1(0.03)	1.17(0.04)	1.0(0.04)	0.26(0.11)
t		-5.694		3.374			t	-3.852	4.632				t	-3.219		4.479			t	-5.191		6.539			t	-6.155		11.206
df		4		4			df	4	4				df	2.071		4			df	4		4			df	4		4
p		0.005		0.028			p	0.018	0.01				p	0.081		0.011			p	0.007		0.003			p	0.004		0.000
5. CBL mRNA expression was measured by qRT-PCR in HUVECs transfected with miR-1287-5p mimic, inhibitor, or NC for 24 hours. all result was used "independent sample t test"
CBL
		MN	mimic	IN	inhibitor
1		1.11965	0.57	1.00614	1.29
2		0.985174	0.8	1.08561	1.58
3		0.895173	0.67	0.908247	1.17
effect size		1.0(0.11)	0.68(0.12)	1(0.09)	1.35(0.21)
t		-3.509		-2.625
df		4		4
p		0.025		0.058
6. HUVECs were transfected with CBL siRNA (si-NC, si-001, si-002, and si-003) for 48 hours, and mRNA expression of CBL was evaluated by RT-PCR to select the most efficient siRNA, all result was used "independent sample t test"
CBL
		si-NC	si-001	si-002	si-003
1		1.0644	0.407	0.252	0.257
2		1.01529	0.25	0.24	0.17
3		0.920303	0.32	0.22	0.17
effect size		1(0.07)	0.33(0.079)	0.24(0.016)	0.20(0.5)
t			10.866	17.608	15.619
df			4	4	4
p			0.000	0.000	0.000
7. The effect of si-CBL or/and miR-1287-5p inhibitor treatment on HUVECs inflammatory factors and adhesion molecules, all result was used "independent sample t test"
IL-6						IL-8					MCP-1					ICAM-1					E-selectin
		si-NC	si-003	si-003+miR-1287-5p inhibitor			si-NC	si-003	si-003+miR-1287-5p inhibitor			si-NC	si-003	si-003+miR-1287-5p inhibitor			si-NC	si-003	si-003+miR-1287-5p inhibitor			si-NC	si-003	si-003+miR-1287-5p inhibitor
1		0.991111	1.46	1.06		1	0.979077	2.95	1.34		1	0.938796	1.67	1.29		1	0.984818	3.86	1.51		1	0.970443	4.69	1.46
2		1.0386	1.39	1.15		2	1.02811	3.61	1.58		2	1.11147	2.78	2.02		2	0.99747	3.03	1.36		2	1.04752	5.44	1.34
3		0.970292	1.48	0.99		3	0.992813	3.76	1.48		3	0.94973	1.96	1.23		3	1.01771	4.71	1.65		3	0.982039	4.96	1.41
effect size		1(0.04)	1.44(0.47)	1.07(0.08)		effect size	1(0.03)	3.44(0.43)	1.47(0.12)		effect size	1(0.097)	2.14(0.58)	1.51(0.44)		effect size	1(0.02)	3.87(0.84)	1.51(0.15)		effect size	1(0.04)	5.03(0.38)	1.4(0.06)
t			-13.056	7.008		t		-9.79	7.638		t		-3.373	1.49		t		-5.91	4.795		t		-18.266	16.332
df			4	4		df		2.014	4		df		4	4		df		4	4		df		4	4
p			0.000	0.002		p		0.01	0.002		p		0.028	0.21		p		0.004	0.009		p		0.000	0.000
8. Correlation between the expression level of miR-1287-5p in MPA-exo and disease activity in patients with MPA
ID	年龄	miR-1287-5p (2-∆CT)		BVAS评分	CRP	C3	C4	MPO
1	76	0.11		18	103.58	1.16	0.21	100
2	43	0.027		14	28.8	1.01	0.39	100
3	53	0.014		15	32	1.12	0.2	320
4	62	0.1		20	131.53	0.85	0.12	320
5	74	0.0015		10	39.5			320
6	73	0.027		18	16.5	0.91	0.17	320
7	68	0.039		17	31.1	1.18	0.27	320
8	76	0.025		20	101.3	1.51	0.36	320
9	58	0.068		20	11.11	0.94	0.27	100
10	77	0.051		18		1.08	0.43	32
11	77	0.00844		6	3	1.21	0.29	320

## Sheet: Neutrophil adhesion
1. Plasma-derived exosomes from the MPA patients induced neutrophil adhesion in HUVECs, all result was used "independent sample t test"
	HC-exo	MPA-exo
1	0.147826	0.247706
2	0.0967742	0.25
3	0.101449	0.22807
effect size	0.12(0.03)	0.24(0.01)
t	-7.144
df	4
p	0.002
2.Mir-1287-5p regulated neutrophil adhesion, all result was used "independent sample t test"
	MN	mimic	IN	inhibitor
1	0.377	1.04	0.44	0.284
2	0.475	1.32	0.48	0.347
3	0.646	1.19	0.662	0.286
effect size	0.5(0.14)	1.18(0.14)	0.53(0.12)	0.31(0.04)
t	-6.064		3.106
df	4		4
p	0.004		0.036
3. Down-regulated CBL promoted neutrophils adhesion, all result was used "independent sample t test"
	si-NC	si-003	si-003+miR-1287-5p inhibitor
1	0.511	1.613	0.459
2	0.622	1.539	0.539
3	0.511	1.816	0.442
effect size	0.55(0.06)	1.66(0.14)	0.48(0.052)
t		-12.217	13.358
df		4	4
p		0.000	0.000

## Sheet: Dual-luciferase reporter assay
Dual-luciferase reporter assay of miR-1287-5p and CBL mRNA 3’-UTR binding sites, the results was used "independent sample t test"
	CBL-WT+NC	CBL-WT+miR-1287-5p	CBL-Mut+NC	CBL-Mut+miR-1287-5p inhibitor
1	1.00235	0.508911	0.978258	1.00928
2	0.979572	0.502372	1.00617	0.963134
3	1.01808	0.480721	1.01557	0.947696
effect size	1(0.02)	0.50(0.01)	1(0.02)	0.97(0.03)
t	35.768		1.231
df	4		4
p	0.000		0.286

## Sheet: Western blot
1. The expression of CBL at the protein levels in HUVECs transfected with miR-1287-5p mimic, inhibitor, or NC for 48 hours. β-tubulin served as an internal reference, the results were used independent sample t test
CBL
	MN	mimic	IN	inhibitor
1	0.909947	0.362229	1.04831	2.20518
2	0.938473	0.36708	1.12331	1.64097
3	1.15158	0.246166	0.828376	1.90605
effect size	1(0.13)	0.33(0.07)	1(0.15)	1.92(0.28)
t	7.859		-4.947
df	4		4
p	0.001		0.008
2. HUVECs were treated with NC-exo or MPA-exo for 48 hours and the CBL protein level in the treated HUVECs were detected by Western blot, the result was used independent sample t test
CBL
	HC-exo	MPA-exo
1	0.989999	0.683516
2	0.797993	0.481536
3	1.35731	0.429949
effect size	1.0(0.28)	0.53(0.13)
t	2.849
df	4
p	0.046
3. Western blot of CBL protein levels under siRNA transfection and si-003 was the most efficient siRNA, the results were used independent sample t test.
CBL
	si-NC	si-001	si-002	si-003
1	0.99989	0.315249	0.327407	0.211004
2	1.05513	0.292403	0.174372	0.0974863
3	0.944983	0.311022	0.245406	0.239044
effect size	1(0.06)	0.31(0.01)	0.25(0.08)	0.18(0.07)
t		21.307	13.789	15.223
df		4	4	4
p		0.000	0.000	0.000
4. Down-regulated CBL activated NF-κB signaling pathway in HUVEC
p-P65/P65
	si-NC	si-CBL	si-CBL+miR-1287-5p inhibitor
1	0.815623	6.53607	1.16339
2	0.806084	7.14639	2.07545
3	1.37829	5.52064	2.64789
P65/Tublin
	si-NC	si-CBL	si-CBL+miR-1287-5p inhibitor
1	0.923788	1.1017	0.976633
2	1.05292	0.950337	0.880337
3	1.02329	0.948437	1.02091

## Sheet: pativsnorm_pvalue_2.Differentia
sRNA	pati_readcount	norm_readcount	log2FoldChange	pval	significant
hsa-miR-200b-5p	14.5668	0.575015	5.1113	0.017438	TRUE
hsa-miR-656-3p	7.28102	0	5.0748	0.026116	TRUE
hsa-miR-1287-5p	11.3031	0.838804	3.9049	0.028985	TRUE
novel_78	0	9.77525	-5.7939	0.030107	TRUE
hsa-miR-3688-5p	6.58792	0	4.9964	0.033558	TRUE
hsa-miR-129-1-3p	0	8.39847	-5.6029	0.038494	TRUE
hsa-miR-223-3p	1038.01	242.735	2.0934	0.043856	TRUE
hsa-miR-1303	22.1323	2.46897	3.1007	0.044399	TRUE
novel_310	0.811619	14.1015	-3.6294	0.047749	TRUE
hsa-miR-1468-5p	1.65988	8.52063	-4.1727	0.052886	FALSE
hsa-miR-149-5p	27.9468	2.7802	3.3007	0.057036	FALSE
hsa-miR-1298-5p	13.3158	1.41348	3.1125	0.061813	FALSE
hsa-miR-424-5p	7.10789	0.575015	4.0539	0.062272	FALSE
hsa-miR-3688-3p	6.89093	0.263789	4.1025	0.064446	FALSE
novel_334	21.5784	0	6.7372	0.085254	FALSE
hsa-miR-133a-3p	24.4755	4.38222	2.4789	0.085348	FALSE
novel_457	0	5.75015	-5.0171	0.088154	FALSE
hsa-miR-708-5p	0	4.86391	-4.7723	0.088925	FALSE
hsa-miR-1291	0.678147	9.30054	-3.2776	0.090387	FALSE
hsa-miR-219a-1-3p	4.50177	0	4.5843	0.092073	FALSE
novel_315	6.63952	0	4.9237	0.095154	FALSE
hsa-miR-2355-3p	17.0878	3.54411	2.3667	0.099035	FALSE
hsa-miR-199b-5p	68.9504	13.3941	2.3605	0.10251	FALSE
novel_456	0	4.66582	-4.7523	0.12032	FALSE
hsa-miR-766-5p	2.12825	12.9312	-2.3167	0.12235	FALSE
hsa-miR-190a-5p	5.84483	0.575015	3.8432	0.12308	FALSE
hsa-miR-766-3p	4.56728	0.311054	3.5421	0.13137	FALSE
hsa-miR-517a-3p	0.912622	9.09531	-2.8816	0.13488	FALSE
novel_335	0	4.35476	-4.6524	0.13499	FALSE
hsa-miR-154-5p	3.89331	0	4.0791	0.13804	FALSE
hsa-miR-500a-5p	0	3.66644	-4.3681	0.13833	FALSE
hsa-miR-7-1-3p	3.41659	0	4.0387	0.13994	FALSE
hsa-miR-9-3p	7.24798	0.791367	2.996	0.14199	FALSE
hsa-miR-449c-5p	0.202006	6.22109	-3.8059	0.14437	FALSE
hsa-miR-654-3p	16.6953	62.0614	-1.8517	0.14732	FALSE
hsa-miR-7151-5p	0	4.04371	-4.5451	0.15204	FALSE
hsa-miR-23a-5p	11.7564	1.84652	2.6168	0.1559	FALSE
hsa-miR-500b-5p	0	3.40265	-4.2546	0.15978	FALSE
novel_529	0	4.0251	-4.4945	0.16067	FALSE
hsa-miR-129-5p	4.97906	16.1434	-1.9977	0.16284	FALSE
hsa-miR-125a-5p	395.772	986.118	-1.3181	0.16924	FALSE
hsa-miR-152-5p	0	3.73265	-4.4291	0.17192	FALSE
novel_329	0	3.73265	-4.4291	0.17192	FALSE
hsa-miR-6734-5p	3.14188	0	4.0782	0.17549	FALSE
hsa-miR-4467	4.8348	0.263789	3.5189	0.17635	FALSE
hsa-miR-7705	0.101003	4.35476	-3.8238	0.18006	FALSE
hsa-miR-34c-5p	12.1519	39.9013	-1.8422	0.18391	FALSE
hsa-miR-377-3p	0	3.06328	-4.1501	0.18429	FALSE
hsa-miR-455-3p	10.6453	1.77214	2.6962	0.18601	FALSE
hsa-miR-1323	0	3.13886	-4.1316	0.18714	FALSE
hsa-miR-454-3p	23.8682	6.3992	1.9306	0.18869	FALSE
hsa-miR-4491	0	2.96926	-4.0697	0.19311	FALSE
hsa-miR-182-5p	1590.59	596.732	1.4151	0.19911	FALSE
hsa-miR-6843-3p	0.101003	4.04371	-3.7162	0.20053	FALSE
hsa-miR-1290	0	3.45009	-4.2686	0.20134	FALSE
hsa-miR-4649-5p	0	3.45009	-4.2686	0.20134	FALSE
hsa-miR-3120-5p	12.8691	3.27997	1.8842	0.20155	FALSE
hsa-miR-4680-5p	2.91459	0	3.9601	0.21008	FALSE
hsa-miR-18a-5p	32.4153	10.6671	1.5906	0.2115	FALSE
hsa-miR-532-3p	21.4508	6.398	1.7066	0.21909	FALSE
hsa-miR-4796-3p	3.42076	0	3.8836	0.21923	FALSE
hsa-miR-5690	3.42076	0	3.8836	0.21923	FALSE
hsa-miR-302d-3p	0	3.11054	-4.1649	0.2227	FALSE
hsa-miR-151b	8.61876	1.89379	2.0717	0.22488	FALSE
hsa-miR-132-3p	15.5511	4.86288	1.717	0.22785	FALSE
hsa-miR-195-3p	12.8055	40.9132	-1.571	0.22816	FALSE
hsa-miR-5189-5p	6.49655	1.05516	2.6004	0.23211	FALSE
novel_388	25.0677	1.15003	4.4985	0.23316	FALSE
hsa-miR-193b-3p	12.9749	3.04399	2.0076	0.23825	FALSE
hsa-miR-144-5p	538.723	193.127	1.4829	0.23829	FALSE
hsa-miR-187-3p	0.101003	3.06328	-3.3227	0.24418	FALSE
hsa-miR-151a-3p	15895.1	47161.9	-1.569	0.24537	FALSE
hsa-miR-183-5p	764.208	325.327	1.2328	0.24687	FALSE
hsa-miR-148a-5p	32.9244	13.4867	1.2651	0.24955	FALSE
hsa-miR-4661-5p	4.16269	0.527578	2.8459	0.25432	FALSE
hsa-miR-664b-3p	0	2.79949	-4.0122	0.2552	FALSE
novel_139	0	2.79949	-4.0122	0.2552	FALSE
novel_257	0	2.87507	-4.0015	0.25606	FALSE
novel_469	0	2.87507	-4.0015	0.25606	FALSE
hsa-miR-194-5p	530.948	225.286	1.2384	0.25607	FALSE
hsa-miR-548e-3p	20.8836	6.8524	1.569	0.25617	FALSE
hsa-miR-516b-5p	12.6004	42.3264	-1.7033	0.26031	FALSE
hsa-miR-514a-3p	10.6742	2.87422	1.8786	0.26182	FALSE
hsa-miR-30b-5p	206.802	94.2818	1.1311	0.26187	FALSE
novel_385	68.0551	3.71388	4.2085	0.26258	FALSE
novel_501	29.13	8.36109	1.7701	0.26504	FALSE
hsa-miR-10394-5p	3.31976	0	3.8699	0.26541	FALSE
hsa-miR-3186-5p	3.31976	0	3.8699	0.26541	FALSE
hsa-miR-3648	3.31976	0	3.8699	0.26541	FALSE
hsa-miR-767-5p	3.31976	0	3.8699	0.26541	FALSE
novel_205	3.31976	0	3.8699	0.26541	FALSE
novel_398	3.31976	0	3.8699	0.26541	FALSE
hsa-miR-450a-5p	88.9003	38.1236	1.2168	0.26797	FALSE
hsa-miR-590-3p	2.66991	0	3.6467	0.26848	FALSE
hsa-miR-214-3p	26.9628	9.48194	1.436	0.27226	FALSE
hsa-miR-3130-3p	4.16988	0.527578	2.8396	0.28005	FALSE
hsa-miR-3130-5p	4.16988	0.527578	2.8396	0.28005	FALSE
hsa-miR-10b-5p	5538.9	11466.6	-1.0497	0.28223	FALSE
hsa-miR-628-5p	5.8809	1.05516	2.2769	0.28283	FALSE
hsa-miR-6761-5p	0	2.25262	-3.657	0.2859	FALSE
hsa-miR-30a-3p	114.114	244.166	-1.096	0.28668	FALSE
hsa-miR-1250-5p	3.93181	0.527578	2.7599	0.2916	FALSE
hsa-miR-1299	6.33478	19.7098	-1.6249	0.29301	FALSE
novel_510	0	2.48844	-3.8415	0.29378	FALSE
hsa-miR-5010-5p	1.21204	6.72972	-2.0679	0.29414	FALSE
hsa-miR-6741-5p	1.11103	7.03992	-2.273	0.2958	FALSE
hsa-miR-3605-5p	2.73787	10.0563	-1.6529	0.29599	FALSE
hsa-miR-410-3p	2.06389	6.58895	-2.2654	0.29951	FALSE
hsa-miR-370-3p	232.939	604.704	-1.3707	0.29991	FALSE
hsa-miR-429	40.6867	13.8468	1.5247	0.30259	FALSE
hsa-miR-32-3p	4.08395	0.527578	2.6981	0.30481	FALSE
hsa-miR-605-3p	0.303009	3.63812	-2.6774	0.30664	FALSE
hsa-miR-199a-3p	706.049	359.221	0.9761	0.30885	FALSE
hsa-miR-22-5p	239.424	107.158	1.164	0.30993	FALSE
hsa-miR-328-3p	39.0094	80.8562	-1.0511	0.31441	FALSE
hsa-miR-3065-5p	15.6087	5.03282	1.5708	0.31536	FALSE
hsa-miR-338-3p	15.6087	5.03282	1.5708	0.31536	FALSE
hsa-miR-485-5p	12.396	32.0482	-1.3995	0.31659	FALSE
hsa-miR-210-3p	17.8311	6.18148	1.5422	0.31796	FALSE
novel_486	91.2934	6.90018	3.7328	0.31856	FALSE
hsa-miR-136-3p	8.49909	23.1883	-1.375	0.3245	FALSE
hsa-miR-324-5p	7.07021	1.31894	2.4182	0.32594	FALSE
hsa-miR-4659a-5p	3.03009	0.263789	3.0666	0.32784	FALSE
hsa-miR-32-5p	95.9243	37.9947	1.342	0.32973	FALSE
hsa-miR-4498	1.96231	0	3.4463	0.33048	FALSE
hsa-miR-449a	0	2.30006	-3.6748	0.33087	FALSE
hsa-miR-889-3p	1.11103	5.84365	-1.9696	0.33175	FALSE
hsa-miR-1292-5p	21.0143	8.1698	1.3325	0.33366	FALSE
hsa-miR-4772-3p	5.28265	0.791367	2.4137	0.33696	FALSE
hsa-miR-146b-3p	11.4768	23.3272	-1.1499	0.33799	FALSE
hsa-miR-3934-5p	1.38517	5.93818	-1.7462	0.33823	FALSE
hsa-miR-548u	4.09891	11.4617	-1.8143	0.33973	FALSE
hsa-miR-7974	8.4004	1.72504	2.2567	0.33988	FALSE
hsa-miR-1911-5p	0	2.17738	-3.648	0.34016	FALSE
hsa-miR-3190-3p	0	2.17738	-3.648	0.34016	FALSE
hsa-miR-642a-5p	0	2.17738	-3.648	0.34016	FALSE
hsa-miR-642b-3p	0	2.17738	-3.648	0.34016	FALSE
hsa-miR-6868-3p	0	2.17738	-3.648	0.34016	FALSE
novel_402	0	2.17738	-3.648	0.34016	FALSE
novel_491	0	2.17738	-3.648	0.34016	FALSE
hsa-miR-744-3p	1.86189	4.97687	-2.3246	0.34224	FALSE
hsa-miR-151a-5p	42.0733	20.4411	1.0777	0.34612	FALSE
hsa-miR-15b-5p	242.096	108.524	1.1588	0.34754	FALSE
hsa-miR-660-3p	0.948686	5.39148	-2.0586	0.34982	FALSE
hsa-miR-597-3p	4.86612	1.46108	1.9788	0.35036	FALSE
hsa-miR-548k	11.4088	3.71388	1.5973	0.35088	FALSE
hsa-miR-6817-3p	2.20398	0	3.5633	0.35348	FALSE
hsa-miR-125a-3p	7.25099	18.0306	-1.2717	0.35382	FALSE
hsa-miR-660-5p	68.6782	33.7456	1.0082	0.35426	FALSE
hsa-miR-181a-2-3p	69.8898	140.276	-0.98538	0.35605	FALSE
hsa-miR-4433a-3p	26.4276	12.8168	1.0863	0.36024	FALSE
hsa-miR-942-5p	38.8655	17.7824	1.1638	0.36036	FALSE
hsa-miR-3180	1.79277	0	3.3427	0.36047	FALSE
hsa-miR-3180-3p	1.79277	0	3.3427	0.36047	FALSE
hsa-miR-196a-5p	15.4109	4.84307	1.5265	0.36126	FALSE
hsa-miR-10a-5p	2866.35	5325.64	-0.89411	0.36452	FALSE
hsa-miR-4433b-5p	26.2256	12.8168	1.0753	0.36495	FALSE
hsa-miR-150-5p	735.055	1416.91	-0.9509	0.36575	FALSE
hsa-miR-582-3p	24.0452	9.72679	1.2193	0.36824	FALSE
hsa-miR-4638-3p	1.79637	0	3.3393	0.37056	FALSE
hsa-miR-4672	1.79637	0	3.3393	0.37056	FALSE
novel_255	1.79637	0	3.3393	0.37056	FALSE
hsa-miR-363-3p	4429.39	2055.03	1.1082	0.37064	FALSE
hsa-miR-548d-5p	12.8728	4.7216	1.4324	0.37143	FALSE
hsa-miR-1268a	16.0669	6.70974	1.3071	0.37714	FALSE
hsa-miR-10392-5p	2.03444	0	3.4715	0.37868	FALSE
hsa-miR-369-5p	13.9141	6.05966	1.1944	0.38106	FALSE
hsa-miR-15b-3p	69.1063	32.4338	1.0959	0.38173	FALSE
hsa-miR-624-5p	4.24213	0.791367	2.4151	0.38259	FALSE
hsa-miR-1278	17.1923	6.66299	1.3098	0.38334	FALSE
hsa-let-7f-1-3p	7.20774	2.42137	1.5315	0.38441	FALSE
hsa-miR-145-3p	21.0502	10.4429	1.0223	0.38519	FALSE
hsa-miR-451b	11.3562	3.66558	1.634	0.38526	FALSE
hsa-miR-541-3p	0	1.86633	-3.4257	0.38603	FALSE
novel_400	0	1.86633	-3.4257	0.38603	FALSE
hsa-miR-320b	725.019	405.972	0.8369	0.3868	FALSE
novel_191	2.54305	0.311054	2.8039	0.39345	FALSE
novel_279	1.8649	0	3.3746	0.39548	FALSE
novel_283	1.8649	0	3.3746	0.39548	FALSE
hsa-miR-224-5p	103.947	190.655	-0.87665	0.39625	FALSE
hsa-miR-652-3p	209.954	112.58	0.90452	0.3991	FALSE
hsa-miR-369-3p	2.13185	0.263789	2.597	0.39914	FALSE
hsa-miR-627-3p	1.59077	0	3.2057	0.40216	FALSE
hsa-miR-4786-5p	1.62683	0	3.2272	0.40274	FALSE
hsa-miR-4647	1.08216	4.92961	-1.822	0.40589	FALSE
hsa-miR-1277-5p	4.83782	1.67761	1.6059	0.40674	FALSE
hsa-miR-361-3p	757.974	1459.45	-0.94354	0.40777	FALSE
hsa-miR-570-3p	2.06389	0	2.961	0.40883	FALSE
hsa-miR-4529-3p	1.69537	0	3.2696	0.41046	FALSE
novel_152	1.69537	0	3.2696	0.41046	FALSE
hsa-miR-769-3p	0	1.72504	-3.2506	0.41159	FALSE
novel_229	0	1.72504	-3.2506	0.41159	FALSE
hsa-miR-342-5p	788.509	1650.72	-1.0643	0.41271	FALSE
hsa-miR-3127-3p	0.101003	2.17738	-2.8172	0.41315	FALSE
hsa-miR-4286	1.61605	0	3.2288	0.41637	FALSE
hsa-miR-342-3p	125.448	224.244	-0.83479	0.41805	FALSE
hsa-miR-6506-5p	0	1.55527	-3.1654	0.42438	FALSE
hsa-miR-6726-5p	0	1.55527	-3.1654	0.42438	FALSE
hsa-miR-7110-5p	0	1.55527	-3.1654	0.42438	FALSE
hsa-miR-664a-5p	24.337	45.3717	-0.90726	0.42457	FALSE
hsa-miR-1247-3p	1.52583	0	3.1542	0.4273	FALSE
hsa-miR-135a-3p	1.52583	0	3.1542	0.4273	FALSE
hsa-miR-509-3-5p	1.52583	0	3.1542	0.4273	FALSE
hsa-miR-885-5p	1.52583	0	3.1542	0.4273	FALSE
hsa-miR-3939	0.169537	2.13012	-2.4677	0.42766	FALSE
hsa-miR-501-5p	2.77034	0.622109	2.1453	0.43098	FALSE
hsa-miR-411-3p	7.11206	1.86633	1.6894	0.43106	FALSE
hsa-miR-200c-3p	330.04	156.557	1.069	0.43215	FALSE
hsa-miR-331-5p	5.57314	15.0801	-1.3045	0.43326	FALSE
hsa-miR-3928-3p	1.4573	0	3.105	0.43461	FALSE
hsa-miR-323a-5p	4.97964	0.933163	2.1761	0.43539	FALSE
hsa-miR-548n	4.02678	0.885898	1.873	0.43594	FALSE
hsa-miR-4726-5p	0	1.46074	-3.0807	0.43639	FALSE
hsa-miR-6735-5p	0.101003	1.81906	-2.5668	0.43844	FALSE
hsa-miR-1306-3p	9.41844	23.3917	-1.2166	0.44248	FALSE
hsa-miR-548ar-3p	0.404012	3.45009	-2.2645	0.44314	FALSE
hsa-miR-455-5p	39.9071	19.6795	0.97399	0.44333	FALSE
hsa-miR-4473	3.40523	10.0285	-1.3854	0.44507	FALSE
hsa-miR-6505-5p	1.96289	0	2.7806	0.4464	FALSE
hsa-miR-6809-5p	1.96289	0	2.7806	0.4464	FALSE
novel_219	1.35629	0	3.0262	0.44646	FALSE
novel_436	1.35629	0	3.0262	0.44646	FALSE
novel_511	1.35629	0	3.0262	0.44646	FALSE
hsa-miR-409-3p	147.883	267.794	-0.85742	0.44764	FALSE
hsa-miR-675-5p	1.65988	2.56385	-2.1107	0.44808	FALSE
novel_474	7.75774	2.61111	1.4835	0.44907	FALSE
hsa-miR-6873-3p	0	1.41382	-2.9715	0.45433	FALSE
hsa-miR-6501-5p	5.88809	1.84652	1.4972	0.45462	FALSE
hsa-miR-3617-5p	1.28776	0	2.9712	0.45483	FALSE
novel_248	4.70737	1.63	1.5674	0.4561	FALSE
hsa-miR-610	2.87192	0.527578	2.1175	0.45695	FALSE
hsa-miR-181b-2-3p	0	1.31894	-2.9444	0.45861	FALSE
hsa-miR-4700-5p	0	1.31894	-2.9444	0.45861	FALSE
hsa-miR-520d-3p	0	1.31894	-2.9444	0.45861	FALSE
novel_166	11.5977	25.7306	-1.1025	0.46196	FALSE
hsa-miR-6818-3p	1.76088	3.11054	-1.9479	0.46321	FALSE
hsa-miR-6502-5p	1.21923	0	2.9136	0.4637	FALSE
hsa-miR-6516-5p	0.808024	3.7608	-1.6805	0.46384	FALSE
hsa-miR-135a-5p	3.21401	8.38752	-1.1644	0.4671	FALSE
hsa-miR-150-3p	36.8021	69.4625	-0.89083	0.46807	FALSE
novel_425	1.18676	0	2.8822	0.46857	FALSE
hsa-miR-142-3p	853.551	519.497	0.71699	0.46937	FALSE
hsa-miR-382-3p	3.08053	8.02086	-1.1819	0.47027	FALSE
hsa-miR-651-5p	18.6058	8.79414	1.0818	0.47051	FALSE
hsa-miR-1228-5p	7.28648	2.92148	1.366	0.47169	FALSE
hsa-miR-4662a-5p	2.2659	0.311054	2.2411	0.47175	FALSE
hsa-miR-4662b	2.2659	0.311054	2.2411	0.47175	FALSE
hsa-miR-4504	0.707021	3.63812	-1.8316	0.47401	FALSE
hsa-miR-4533	0	1.24422	-2.8473	0.47413	FALSE
hsa-miR-4724-5p	0	1.24422	-2.8473	0.47413	FALSE
hsa-miR-6861-5p	0	1.24422	-2.8473	0.47413	FALSE
novel_527	0	1.24422	-2.8473	0.47413	FALSE
hsa-miR-539-5p	0.303009	2.44117	-2.1015	0.47427	FALSE
hsa-let-7e-3p	0.472546	2.7524	-1.8496	0.47526	FALSE
hsa-miR-92b-5p	13.0112	6.85137	1.013	0.47539	FALSE
hsa-miR-29a-3p	449.489	722.024	-0.6853	0.47591	FALSE
hsa-miR-3199	1.11822	0	2.8199	0.47832	FALSE
hsa-miR-99a-3p	1.11822	0	2.8199	0.47832	FALSE
hsa-miR-6884-5p	3.31976	0.527578	2.1895	0.47983	FALSE
hsa-miR-155-5p	403.941	675.079	-0.73734	0.48165	FALSE
hsa-miR-548f-3p	2.30138	0.527578	2.0241	0.48498	FALSE
hsa-miR-101-5p	0.505015	3.45009	-2.0445	0.48591	FALSE
hsa-miR-664a-3p	2.06389	3.80738	-1.5378	0.48715	FALSE
hsa-miR-195-5p	8.11734	14.5426	-0.8719	0.4881	FALSE
hsa-miR-130b-3p	8.59964	4.2406	1.1073	0.49107	FALSE
hsa-miR-6724-5p	0	1.14969	-2.7422	0.49124	FALSE
hsa-miR-4796-5p	0.202006	2.30006	-2.2992	0.4926	FALSE
hsa-miR-552-3p	1.86189	0	2.5574	0.49297	FALSE
hsa-miR-582-5p	1.86189	0	2.5574	0.49297	FALSE
hsa-miR-3128	1.01003	0	2.7263	0.49318	FALSE
hsa-miR-301a-5p	3.88195	1.19695	1.6039	0.4937	FALSE
hsa-miR-4522	1.01722	0	2.7178	0.49454	FALSE
hsa-miR-5683	1.01722	0	2.7178	0.49454	FALSE
hsa-miR-7844-5p	1.01722	0	2.7178	0.49454	FALSE
hsa-miR-887-5p	1.01722	0	2.7178	0.49454	FALSE
novel_175	1.01722	0	2.7178	0.49454	FALSE
hsa-miR-579-5p	4.55233	1.58273	1.5622	0.49565	FALSE
hsa-miR-24-2-5p	97.2606	169.324	-0.78645	0.4971	FALSE
hsa-miR-374a-5p	142.335	80.9588	0.82578	0.49794	FALSE
hsa-miR-625-5p	34.6563	20.8657	0.76955	0.49828	FALSE
hsa-miR-548i	0.981156	0	2.6847	0.49987	FALSE
hsa-miR-598-5p	0.981156	0	2.6847	0.49987	FALSE
hsa-miR-550a-3p	1.71705	0.575015	2.3475	0.5027	FALSE
hsa-miR-550b-2-5p	1.71705	0.575015	2.3475	0.5027	FALSE
hsa-miR-1277-3p	2.16489	0.263789	2.1073	0.50634	FALSE
hsa-miR-192-5p	1900.88	1197.73	0.66637	0.50645	FALSE
hsa-miR-339-5p	77.1438	48.1283	0.66811	0.50668	FALSE
hsa-miR-106a-5p	32.94	15.3472	1.1015	0.507	FALSE
hsa-miR-1248	0	1.15003	-2.6436	0.50758	FALSE
hsa-miR-147b-5p	0	1.15003	-2.6436	0.50758	FALSE
hsa-miR-187-5p	0	1.15003	-2.6436	0.50758	FALSE
hsa-miR-4454	0	1.15003	-2.6436	0.50758	FALSE
novel_230	0	1.15003	-2.6436	0.50758	FALSE
novel_372	0	1.15003	-2.6436	0.50758	FALSE
hsa-miR-34b-3p	0.303009	2.48844	-2.1219	0.5081	FALSE
hsa-miR-10399-5p	1.65571	5.17496	-1.3103	0.50926	FALSE
hsa-miR-4709-5p	0	1.05516	-2.63	0.50986	FALSE
novel_272	0	1.05516	-2.63	0.50986	FALSE
hsa-miR-28-3p	279.347	453.095	-0.69619	0.51061	FALSE
hsa-miR-3179	0.909027	0	2.6162	0.51097	FALSE
hsa-miR-323b-3p	5.92473	10.7741	-1.1367	0.5115	FALSE
hsa-miR-4772-5p	5.08064	1.31894	1.6481	0.51201	FALSE
hsa-miR-200b-3p	254.997	132.096	0.93963	0.51385	FALSE
hsa-miR-338-5p	30.6249	18.5944	0.73098	0.51486	FALSE
hsa-miR-452-5p	10.2864	17.8437	-0.91225	0.51496	FALSE
hsa-let-7g-3p	0.876558	0	2.5751	0.51769	FALSE
hsa-miR-522-3p	0.876558	0	2.5751	0.51769	FALSE
hsa-miR-10b-3p	9.5663	19.1422	-0.85685	0.51784	FALSE
hsa-miR-10399-3p	4.29257	2.03576	1.221	0.51817	FALSE
hsa-miR-412-5p	0.880153	0	2.5693	0.51865	FALSE
hsa-miR-548ad-5p	9.44847	4.45781	1.1183	0.52343	FALSE
hsa-miR-7704	2.16791	6.01376	-1.2223	0.5249	FALSE
hsa-miR-6842-3p	26.7256	52.8006	-0.94118	0.52503	FALSE
hsa-miR-3681-3p	0.847683	0	2.5259	0.5258	FALSE
hsa-miR-4645-3p	0.847683	0	2.5259	0.5258	FALSE
hsa-miR-4686	0.847683	0	2.5259	0.5258	FALSE
hsa-miR-4717-3p	0.847683	0	2.5259	0.5258	FALSE
hsa-miR-330-5p	43.6302	25.1042	0.81474	0.52744	FALSE
hsa-miR-505-3p	32.2871	18.9795	0.71541	0.52862	FALSE
hsa-miR-99b-5p	1183.55	1824.63	-0.62529	0.52955	FALSE
hsa-miR-182-3p	0.808024	0	2.4944	0.53103	FALSE
hsa-miR-197-5p	0.808024	0	2.4944	0.53103	FALSE
hsa-miR-580-3p	0.808024	0	2.4944	0.53103	FALSE
novel_312	1.45011	0.263789	2.1601	0.53141	FALSE
hsa-miR-6503-3p	3.89575	1.63017	1.3713	0.53388	FALSE
hsa-miR-1260b	0.404012	2.44134	-1.8097	0.53451	FALSE
hsa-miR-181d-5p	37.6499	22.2898	0.77348	0.53463	FALSE
hsa-miR-543	43.4738	72.4548	-0.72383	0.53495	FALSE
hsa-miR-548t-3p	9.75148	4.7216	1.0779	0.53614	FALSE
hsa-miR-216b-5p	0.77915	0	2.4407	0.54	FALSE
hsa-miR-17-3p	11.7463	6.23029	0.98502	0.54074	FALSE
hsa-miR-509-5p	0	0.933163	-2.4382	0.54249	FALSE
novel_297	0	0.933163	-2.4382	0.54249	FALSE
hsa-miR-3149	0.101003	1.55527	-2.3284	0.5433	FALSE
hsa-miR-335-5p	9.39015	16.8896	-0.75649	0.54333	FALSE
hsa-miR-2277-5p	2.06389	0.263789	1.9499	0.54422	FALSE
hsa-miR-3120-3p	14.6186	8.12288	0.77662	0.54425	FALSE
hsa-miR-4677-3p	2.4679	5.00536	-1.2928	0.5443	FALSE
hsa-miR-140-3p	1586.89	2378.83	-0.58517	0.54451	FALSE
hsa-miR-483-5p	74.7802	40.5912	0.89491	0.54455	FALSE
hsa-miR-30c-2-3p	14.5615	22.3935	-0.72327	0.54605	FALSE
hsa-miR-1301-3p	35.2904	57.3607	-0.65363	0.54849	FALSE
hsa-miR-3529-3p	1704.07	1126.18	0.59753	0.55133	FALSE
hsa-miR-3200-5p	0.707021	0	2.3579	0.55397	FALSE
hsa-miR-605-5p	0.707021	0	2.3579	0.55397	FALSE
hsa-miR-6804-5p	0.707021	0	2.3579	0.55397	FALSE
hsa-miR-6862-5p	0.707021	0	2.3579	0.55397	FALSE
hsa-miR-9903	0.707021	0	2.3579	0.55397	FALSE
hsa-miR-3065-3p	30.6249	19.4807	0.66598	0.55446	FALSE
hsa-miR-7-5p	1707.45	1132.29	0.59258	0.55484	FALSE
hsa-miR-16-1-3p	1.76088	0	2.2618	0.55492	FALSE
hsa-miR-202-3p	1.76088	0	2.2618	0.55492	FALSE
hsa-miR-222-5p	1.76088	0	2.2618	0.55492	FALSE
hsa-miR-550a-3-5p	34.53	22.2314	0.66691	0.55494	FALSE
hsa-miR-550a-5p	34.53	22.2314	0.66691	0.55494	FALSE
hsa-miR-425-5p	1065.13	1721.07	-0.69111	0.55527	FALSE
hsa-miR-4709-3p	0.710616	0	2.349	0.55549	FALSE
hsa-miR-12136	0.303009	2.30006	-1.9415	0.55657	FALSE
hsa-let-7c-5p	875.918	1297.85	-0.56597	0.55719	FALSE
hsa-miR-589-5p	23.3667	36.7489	-0.66388	0.56154	FALSE
hsa-miR-215-5p	74.2265	41.3903	0.81601	0.56159	FALSE
hsa-miR-19a-3p	42.2301	24.0673	0.82016	0.56258	FALSE
hsa-miR-4746-5p	4.6858	10.3472	-0.99965	0.56278	FALSE
hsa-miR-548ap-3p	8.84246	4.45781	1.0147	0.56441	FALSE
hsa-miR-1538	0.678147	0	2.2953	0.56466	FALSE
hsa-miR-4657	0.678147	0	2.2953	0.56466	FALSE
hsa-miR-5589-5p	0.678147	0	2.2953	0.56466	FALSE
hsa-miR-6504-3p	0.678147	0	2.2953	0.56466	FALSE
hsa-miR-6511b-5p	0.678147	0	2.2953	0.56466	FALSE
hsa-miR-7855-5p	0.678147	0	2.2953	0.56466	FALSE
novel_213	0.678147	0	2.2953	0.56466	FALSE
hsa-miR-340-5p	382.626	249.892	0.61136	0.56487	FALSE
hsa-miR-1185-1-3p	2.77091	6.01394	-1.2408	0.56494	FALSE
hsa-miR-126-3p	76529.7	121834	-0.67081	0.56536	FALSE
hsa-miR-451a	289540	158456	0.86966	0.56558	FALSE
hsa-miR-365a-3p	7.01106	2.7802	1.1284	0.56682	FALSE
hsa-miR-30c-1-3p	3.88856	8.68972	-1.0126	0.56716	FALSE
hsa-miR-26b-3p	3.17435	1.36621	1.2852	0.57003	FALSE
hsa-miR-378a-5p	6.35287	2.90168	1.097	0.57011	FALSE
hsa-miR-664b-5p	6.2638	11.509	-1.0808	0.57322	FALSE
hsa-miR-181b-5p	218.513	318.022	-0.54495	0.57566	FALSE
hsa-miR-520g-5p	0	0.791367	-2.2409	0.57687	FALSE
hsa-miR-592	0	0.791367	-2.2409	0.57687	FALSE
hsa-miR-619-5p	0	0.791367	-2.2409	0.57687	FALSE
hsa-miR-629-3p	0	0.791367	-2.2409	0.57687	FALSE
hsa-miR-6839-5p	0	0.791367	-2.2409	0.57687	FALSE
hsa-miR-16-5p	1432.3	894.658	0.6796	0.57963	FALSE
hsa-miR-371a-3p	0.202006	1.63017	-1.8546	0.57997	FALSE
hsa-miR-371b-5p	0.202006	1.63017	-1.8546	0.57997	FALSE
hsa-miR-3157-5p	0.606018	0	2.2027	0.58063	FALSE
hsa-miR-376c-3p	0.606018	0	2.2027	0.58063	FALSE
hsa-miR-491-5p	0.606018	0	2.2027	0.58063	FALSE
hsa-miR-424-3p	90.0426	61.5326	0.56363	0.58114	FALSE
hsa-miR-576-3p	36.8967	57.2948	-0.61061	0.58155	FALSE
hsa-miR-17-5p	363.282	235.778	0.62613	0.58185	FALSE
hsa-miR-758-3p	2.6008	6.90018	-1.2023	0.58234	FALSE
hsa-miR-499a-5p	18.9414	11.7612	0.74701	0.58525	FALSE
hsa-miR-192-3p	0	0.838804	-2.1812	0.58731	FALSE
hsa-miR-6785-5p	0	0.838804	-2.1812	0.58731	FALSE
hsa-miR-4488	13.6181	25.8755	-1.0389	0.58843	FALSE
novel_127	1.79637	4.78849	-1.1719	0.58901	FALSE
hsa-miR-548q	3.21041	1.31894	1.3318	0.58913	FALSE
hsa-miR-499b-3p	18.8404	11.7612	0.73954	0.5892	FALSE
hsa-miR-6515-5p	6.26207	12.6862	-0.90865	0.58973	FALSE
hsa-miR-1273c	0.573549	0	2.1414	0.59132	FALSE
hsa-miR-4466	0.573549	0	2.1414	0.59132	FALSE
hsa-miR-6741-3p	0.573549	0	2.1414	0.59132	FALSE
hsa-miR-3157-3p	2.69821	1.05516	1.4077	0.59269	FALSE
hsa-miR-19b-3p	121.021	75.8407	0.67194	0.59332	FALSE
hsa-miR-1180-3p	163.995	109.938	0.57966	0.59413	FALSE
hsa-miR-362-5p	15.9028	9.84775	0.64641	0.59525	FALSE
hsa-miR-1307-3p	493.446	730.956	-0.56637	0.59676	FALSE
hsa-miR-4658	1.35629	0.263789	2.0651	0.59832	FALSE
hsa-miR-1843	40.9688	63.1995	-0.5955	0.59924	FALSE
hsa-miR-615-3p	31.5377	8.05021	1.9662	0.59948	FALSE
novel_261	4.97964	1.72504	1.4297	0.59982	FALSE
hsa-miR-128-3p	860.829	1203.17	-0.48238	0.60118	FALSE
hsa-miR-3124-5p	0.707021	2.75222	-1.4353	0.6024	FALSE
hsa-miR-518a-3p	0.541079	0	2.0759	0.60283	FALSE
hsa-miR-548w	0.541079	0	2.0759	0.60283	FALSE
hsa-miR-23b-5p	2.06331	4.64618	-0.95833	0.60506	FALSE
hsa-miR-548j-5p	17.5286	10.1703	0.79818	0.60506	FALSE
hsa-miR-3164	1.15069	0.263789	1.8952	0.60695	FALSE
hsa-miR-139-5p	1666.61	2454.57	-0.55778	0.60889	FALSE
hsa-miR-25-5p	14.7787	8.94153	0.77532	0.60922	FALSE
hsa-miR-204-3p	33.1835	19.0018	0.81711	0.60924	FALSE
hsa-miR-6766-5p	0.101003	1.24422	-2.0083	0.61055	FALSE
hsa-miR-1270	0.505015	0	2.0225	0.61229	FALSE
hsa-miR-188-5p	0.505015	0	2.0225	0.61229	FALSE
hsa-miR-3135a	0.505015	0	2.0225	0.61229	FALSE
hsa-miR-3155b	0.505015	0	2.0225	0.61229	FALSE
hsa-miR-539-3p	0.505015	0	2.0225	0.61229	FALSE
hsa-miR-548at-3p	0.505015	0	2.0225	0.61229	FALSE
hsa-miR-942-3p	0.505015	0	2.0225	0.61229	FALSE
novel_523	0.505015	0	2.0225	0.61229	FALSE
hsa-miR-3941	0.50861	0	2.0056	0.6153	FALSE
hsa-miR-6779-5p	0.50861	0	2.0056	0.6153	FALSE
hsa-miR-361-5p	25.1576	16.2471	0.58627	0.61591	FALSE
hsa-miR-374b-3p	4.22879	1.72504	1.2327	0.61812	FALSE
hsa-miR-140-5p	168.795	118.386	0.50185	0.61893	FALSE
hsa-miR-20a-5p	693.426	448.709	0.62706	0.6196	FALSE
hsa-miR-191-3p	4.43079	1.81923	1.1069	0.62064	FALSE
hsa-miR-331-3p	0.472546	0	1.9491	0.6254	FALSE
hsa-miR-431-5p	8.02238	26.1286	-1.6758	0.62547	FALSE
hsa-miR-106b-5p	181.085	118.451	0.61614	0.62586	FALSE
hsa-miR-18b-5p	0.909027	3.09143	-1.278	0.62691	FALSE
hsa-miR-1295a	0	0.622109	-1.9555	0.62749	FALSE
hsa-miR-3129-5p	0	0.622109	-1.9555	0.62749	FALSE
hsa-miR-4671-5p	0	0.622109	-1.9555	0.62749	FALSE
hsa-miR-519c-5p	0	0.622109	-1.9555	0.62749	FALSE
hsa-miR-5585-3p	0	0.622109	-1.9555	0.62749	FALSE
hsa-miR-30e-3p	218.102	304.427	-0.48392	0.62915	FALSE
hsa-miR-382-5p	38.5649	60.4283	-0.60952	0.62919	FALSE
hsa-miR-21-3p	17.8746	10.5854	0.66498	0.62961	FALSE
hsa-miR-125b-1-3p	13.0398	7.42707	0.68489	0.633	FALSE
hsa-miR-4659b-3p	2.92909	1.41382	1.2632	0.63339	FALSE
hsa-miR-339-3p	102.933	71.5711	0.53847	0.63343	FALSE
hsa-miR-144-3p	1178.05	748.218	0.65491	0.63427	FALSE
hsa-miR-1273h-5p	5.01095	2.48844	0.97025	0.63635	FALSE
hsa-miR-320d	25.1035	17.2272	0.58192	0.63838	FALSE
hsa-miR-374b-5p	81.0052	56.9968	0.50944	0.63867	FALSE
hsa-miR-374c-3p	81.0052	56.9968	0.50944	0.63867	FALSE
hsa-miR-1-3p	28.0712	40.8982	-0.54196	0.63891	FALSE
hsa-miR-3163	1.86189	0.575015	1.5088	0.63894	FALSE
hsa-miR-4678	0.440076	0	1.8696	0.63974	FALSE
hsa-miR-550b-3p	26.0892	18.1597	0.54813	0.64015	FALSE
novel_411	3.31976	1.15003	1.3955	0.64072	FALSE
hsa-miR-4646-5p	0	0.574843	-1.8784	0.64147	FALSE
hsa-miR-3184-5p	1117.9	1517.81	-0.4425	0.64364	FALSE
hsa-miR-598-3p	13.9297	19.5	-0.53862	0.64473	FALSE
hsa-miR-423-3p	1126.75	1527.22	-0.44	0.64484	FALSE
hsa-miR-7976	14.3899	8.847	0.73083	0.64502	FALSE
hsa-miR-708-3p	1.65211	3.90191	-0.98783	0.6486	FALSE
hsa-miR-10393-3p	1.65988	0	1.8116	0.65027	FALSE
hsa-miR-10394-3p	1.65988	0	1.8116	0.65027	FALSE
hsa-miR-10526-3p	1.65988	0	1.8116	0.65027	FALSE
hsa-miR-141-5p	1.65988	0	1.8116	0.65027	FALSE
hsa-miR-215-3p	1.65988	0	1.8116	0.65027	FALSE
hsa-miR-2682-5p	1.65988	0	1.8116	0.65027	FALSE
hsa-miR-3152-5p	1.65988	0	1.8116	0.65027	FALSE
hsa-miR-3611	1.65988	0	1.8116	0.65027	FALSE
hsa-miR-3659	1.65988	0	1.8116	0.65027	FALSE
hsa-miR-525-5p	1.65988	0	1.8116	0.65027	FALSE
hsa-miR-663a	1.65988	0	1.8116	0.65027	FALSE
hsa-miR-663b	1.65988	0	1.8116	0.65027	FALSE
hsa-miR-6759-5p	1.65988	0	1.8116	0.65027	FALSE
hsa-miR-6770-3p	1.65988	0	1.8116	0.65027	FALSE
novel_195	1.65988	0	1.8116	0.65027	FALSE
novel_460	1.65988	0	1.8116	0.65027	FALSE
hsa-miR-3173-5p	0.404012	0	1.8077	0.65099	FALSE
hsa-miR-4503	0.404012	0	1.8077	0.65099	FALSE
hsa-miR-4660	0.404012	0	1.8077	0.65099	FALSE
hsa-miR-4742-5p	0.404012	0	1.8077	0.65099	FALSE
hsa-miR-4747-5p	0.404012	0	1.8077	0.65099	FALSE
hsa-miR-548at-5p	0.404012	0	1.8077	0.65099	FALSE
hsa-miR-655-3p	0.404012	0	1.8077	0.65099	FALSE
hsa-miR-6825-5p	0.404012	0	1.8077	0.65099	FALSE
hsa-miR-937-3p	0.404012	0	1.8077	0.65099	FALSE
hsa-miR-98-3p	0.404012	0	1.8077	0.65099	FALSE
novel_208	0.404012	0	1.8077	0.65099	FALSE
hsa-miR-1285-3p	22.2691	14.304	0.64167	0.65456	FALSE
hsa-miR-10a-3p	24.4858	14.8076	0.64646	0.65579	FALSE
hsa-miR-1283	0	0.527578	-1.7971	0.65632	FALSE
hsa-miR-224-3p	0	0.527578	-1.7971	0.65632	FALSE
hsa-miR-3059-5p	0	0.527578	-1.7971	0.65632	FALSE
hsa-miR-372-3p	0	0.527578	-1.7971	0.65632	FALSE
hsa-miR-3920	0	0.527578	-1.7971	0.65632	FALSE
hsa-miR-431-3p	0	0.527578	-1.7971	0.65632	FALSE
hsa-miR-4750-5p	0	0.527578	-1.7971	0.65632	FALSE
hsa-miR-5006-3p	0	0.527578	-1.7971	0.65632	FALSE
hsa-miR-6837-3p	0	0.527578	-1.7971	0.65632	FALSE
hsa-miR-6850-5p	0	0.527578	-1.7971	0.65632	FALSE
hsa-miR-6851-5p	0	0.527578	-1.7971	0.65632	FALSE
hsa-miR-6875-5p	0	0.527578	-1.7971	0.65632	FALSE
hsa-miR-6881-5p	0	0.527578	-1.7971	0.65632	FALSE
hsa-miR-933	0	0.527578	-1.7971	0.65632	FALSE
hsa-miR-874-3p	16.5413	23.4107	-0.51597	0.65678	FALSE
hsa-miR-100-5p	1119.29	804.351	0.47591	0.65733	FALSE
hsa-let-7d-5p	1498.73	1107.31	0.43752	0.65849	FALSE
hsa-miR-148b-3p	454.289	341.6	0.41288	0.65901	FALSE
hsa-miR-93-5p	676.402	477.78	0.50142	0.65901	FALSE
hsa-miR-1908-5p	27.7291	19.2142	0.56312	0.65914	FALSE
hsa-miR-769-5p	35.6995	48.8706	-0.48198	0.65918	FALSE
hsa-miR-181c-3p	11.9523	7.22898	0.67002	0.66109	FALSE
hsa-miR-221-5p	38.022	51.7907	-0.46954	0.66119	FALSE
hsa-miR-548l	1.51505	0.527578	1.5505	0.66559	FALSE
hsa-miR-214-5p	12.4537	8.12288	0.5629	0.66613	FALSE
hsa-miR-450a-2-3p	1.79277	0.885898	1.1615	0.66643	FALSE
hsa-miR-4429	0.371543	0	1.7162	0.66775	FALSE
hsa-miR-3158-5p	218.364	319.861	-0.54366	0.66819	FALSE
hsa-miR-148b-5p	31.697	22.9966	0.4627	0.66853	FALSE
hsa-miR-3158-3p	218.667	319.861	-0.54167	0.66936	FALSE
hsa-miR-29b-3p	49.234	68.9546	-0.48393	0.66987	FALSE
hsa-miR-6806-3p	1.81805	4.19316	-0.99144	0.67187	FALSE
hsa-let-7b-3p	7.52165	12.3157	-0.67955	0.67206	FALSE
hsa-miR-221-3p	829.923	630.573	0.39615	0.67262	FALSE
hsa-miR-3690	4.20235	2.3939	0.89023	0.67265	FALSE
hsa-miR-1255b-5p	10.0173	17.0166	-0.6808	0.67457	FALSE
hsa-miR-200a-3p	111.439	73.6642	0.57515	0.67569	FALSE
hsa-miR-20b-5p	58.0447	39.3392	0.58277	0.67696	FALSE
hsa-miR-329-3p	0.909027	0.311054	1.6545	0.67764	FALSE
hsa-miR-654-5p	25.3302	38.891	-0.57927	0.67825	FALSE
hsa-miR-103b	1831.47	1368.36	0.42095	0.67836	FALSE
hsa-miR-296-3p	0.50861	1.98883	-1.2739	0.67863	FALSE
hsa-miR-425-3p	61.1444	44.6696	0.4532	0.68285	FALSE
hsa-miR-7706	22.1854	31.4217	-0.45586	0.6846	FALSE
novel_508	14.9389	5.1277	1.5263	0.68463	FALSE
hsa-miR-146a-3p	2.42407	5.20174	-0.915	0.68475	FALSE
hsa-miR-122b-5p	3.52478	1.58273	1.0319	0.68502	FALSE
hsa-miR-497-5p	0.876558	0.263789	1.6134	0.68526	FALSE
hsa-miR-208a-3p	0.339073	0	1.6145	0.68655	FALSE
novel_327	0.339073	0	1.6145	0.68655	FALSE
novel_434	0.339073	0	1.6145	0.68655	FALSE
hsa-miR-616-3p	0.101003	0.933163	-1.5991	0.687	FALSE
hsa-miR-6810-5p	0.101003	0.933163	-1.5991	0.687	FALSE
hsa-miR-4683	0.202006	1.31894	-1.5735	0.68765	FALSE
hsa-miR-103a-3p	1846.8	1394.06	0.40613	0.68828	FALSE
hsa-miR-206	7.15301	12.1207	-0.63376	0.6891	FALSE
hsa-miR-671-3p	4.73984	8.12305	-0.62236	0.69003	FALSE
hsa-miR-145-5p	25.5525	33.9232	-0.49667	0.69194	FALSE
novel_444	0.303009	1.55527	-1.4441	0.6931	FALSE
hsa-miR-618	5.42517	10.0438	-0.80627	0.69342	FALSE
hsa-let-7e-5p	197.799	255.337	-0.37412	0.69416	FALSE
hsa-miR-27a-5p	87.7245	121.197	-0.45791	0.69673	FALSE
hsa-miR-193a-5p	125.776	93.4552	0.43963	0.69798	FALSE
hsa-miR-106b-3p	611.756	466.472	0.39358	0.69801	FALSE
hsa-miR-324-3p	1.61964	0.791367	1.1756	0.6988	FALSE
hsa-miR-409-5p	1.11103	2.96926	-1.0096	0.69961	FALSE
hsa-miR-1343-3p	0.808024	0.311054	1.5326	0.70032	FALSE
hsa-miR-4797-3p	0.808024	0.575015	1.5326	0.70032	FALSE
hsa-miR-1537-3p	0.303009	0	1.5407	0.70033	FALSE
hsa-miR-193a-3p	0.303009	0	1.5407	0.70033	FALSE
hsa-miR-26a-1-3p	0.303009	0	1.5407	0.70033	FALSE
hsa-miR-301b-3p	0.303009	0	1.5407	0.70033	FALSE
hsa-miR-4479	0.303009	0	1.5407	0.70033	FALSE
hsa-miR-4639-5p	0.303009	0	1.5407	0.70033	FALSE
hsa-miR-4677-5p	0.303009	0	1.5407	0.70033	FALSE
hsa-miR-4749-5p	0.303009	0	1.5407	0.70033	FALSE
hsa-miR-4779	0.303009	0	1.5407	0.70033	FALSE
hsa-miR-489-3p	0.303009	0	1.5407	0.70033	FALSE
hsa-miR-5090	0.303009	0	1.5407	0.70033	FALSE
hsa-miR-518c-3p	0.303009	0	1.5407	0.70033	FALSE
hsa-miR-548a-3p	0.303009	0	1.5407	0.70033	FALSE
hsa-miR-548ay-3p	0.303009	0	1.5407	0.70033	FALSE
hsa-miR-561-5p	0.303009	0	1.5407	0.70033	FALSE
hsa-miR-6513-5p	0.303009	0	1.5407	0.70033	FALSE
hsa-miR-6803-3p	0.303009	0	1.5407	0.70033	FALSE
hsa-miR-6529-5p	3.31976	1.24422	1.1237	0.70243	FALSE
hsa-miR-5009-5p	2.32666	4.52402	-0.7783	0.70461	FALSE
hsa-miR-6772-3p	0.202006	1.24422	-1.4764	0.70637	FALSE
hsa-miR-219a-2-3p	3.35107	6.33093	-0.80505	0.70662	FALSE
hsa-miR-219b-5p	3.35107	6.33093	-0.80505	0.70662	FALSE
hsa-miR-3194-3p	1.31304	0.527578	1.3939	0.70722	FALSE
hsa-miR-186-5p	2021.27	1529.71	0.4026	0.70906	FALSE
hsa-miR-548az-5p	1.18316	0.527578	1.2737	0.70918	FALSE
hsa-miR-502-3p	57.5896	44.0688	0.40912	0.70936	FALSE
hsa-miR-3074-3p	24.1357	16.4814	0.58156	0.7111	FALSE
hsa-miR-326	5.0934	3.32707	0.71039	0.71311	FALSE
hsa-miR-93-3p	5.55876	3.61832	0.70278	0.71453	FALSE
hsa-miR-29b-2-5p	0.808024	2.29989	-0.96227	0.71481	FALSE
hsa-miR-548j-3p	3.34806	4.83507	-0.6678	0.71741	FALSE
hsa-miR-143-3p	2653.46	2013.77	0.39717	0.71864	FALSE
hsa-miR-365b-5p	7.75659	11.3206	-0.5911	0.71913	FALSE
hsa-miR-30e-5p	2786.86	2125.18	0.39053	0.72018	FALSE
hsa-miR-193b-5p	16.2359	10.8671	0.61778	0.72117	FALSE
hsa-miR-877-5p	8.39507	5.84365	0.50026	0.72231	FALSE
hsa-miR-487b-3p	1.41404	0.838804	1.1304	0.72463	FALSE
hsa-miR-5193	0.101003	0.791367	-1.4018	0.7248	FALSE
hsa-miR-204-5p	35.7943	45.4389	-0.39473	0.72497	FALSE
hsa-miR-484	191.672	250.322	-0.3843	0.7256	FALSE
hsa-miR-519d-3p	1.11463	0.527578	1.2115	0.72662	FALSE
hsa-miR-504-5p	4.33281	2.61043	0.64516	0.72781	FALSE
hsa-miR-340-3p	53.2392	70.1644	-0.38733	0.72934	FALSE
hsa-miR-1304-5p	11.3411	8.04781	0.5582	0.73049	FALSE
hsa-miR-3909	1.92984	1.05516	0.97257	0.73167	FALSE
hsa-miR-548ah-3p	3.72621	6.39035	-0.65137	0.73434	FALSE
hsa-miR-548p	3.72621	6.39035	-0.65137	0.73434	FALSE
hsa-miR-3138	3.07334	1.86633	0.81809	0.7354	FALSE
hsa-miR-1271-5p	4.46211	7.35097	-0.58907	0.73758	FALSE
novel_466	0.678147	0.263789	1.3335	0.73792	FALSE
hsa-miR-1255a	9.6746	14.8637	-0.52231	0.73869	FALSE
hsa-miR-122-3p	3.18571	1.58273	0.86223	0.73909	FALSE
novel_455	1.18676	0.527578	1.2691	0.73977	FALSE
hsa-miR-6866-5p	1.71705	3.66644	-0.80908	0.74176	FALSE
hsa-miR-30d-5p	5659.16	6952.26	-0.29697	0.74388	FALSE
hsa-miR-330-3p	34.3913	44.6676	-0.38244	0.74466	FALSE
hsa-miR-190b-5p	0.472546	1.46074	-0.96679	0.74564	FALSE
hsa-miR-518b	0.472546	1.46074	-0.96679	0.74564	FALSE
hsa-miR-33a-5p	2.3669	1.15003	0.90933	0.74819	FALSE
hsa-miR-127-3p	78.0206	61.8567	0.33723	0.7499	FALSE
hsa-miR-939-5p	5.06093	3.52379	0.60671	0.75113	FALSE
hsa-miR-148a-3p	19822.8	25416.3	-0.35857	0.75298	FALSE
hsa-miR-7854-3p	1.11103	0.527578	1.2143	0.75313	FALSE
hsa-miR-23a-3p	374.547	303.649	0.30163	0.75361	FALSE
hsa-miR-4511	0.606018	0.263789	1.2409	0.75562	FALSE
hsa-miR-627-5p	0.606018	0.263789	1.2409	0.75562	FALSE
hsa-miR-643	0.606018	0.575015	1.2409	0.75562	FALSE
hsa-miR-4781-3p	0.977561	2.20484	-0.79053	0.75621	FALSE
hsa-let-7a-3p	30.2323	22.3871	0.46487	0.75743	FALSE
hsa-miR-6750-5p	0.609613	0.263789	1.2288	0.75794	FALSE
hsa-miR-628-3p	9.33959	7.04009	0.44074	0.75801	FALSE
hsa-miR-760	2.50339	1.55527	0.78683	0.75933	FALSE
hsa-miR-3605-3p	2.98011	1.58273	0.71299	0.76176	FALSE
hsa-miR-6852-5p	14.0573	20.1049	-0.43658	0.76322	FALSE
hsa-miR-15a-5p	46.004	32.2124	0.5223	0.76484	FALSE
hsa-miR-2115-3p	0.981156	0.527578	1.0705	0.76486	FALSE
hsa-miR-6716-3p	0.77915	1.89396	-0.81653	0.76565	FALSE
hsa-miR-542-3p	9.72005	6.54151	0.50116	0.76601	FALSE
hsa-miR-125b-2-3p	6.36006	8.79328	-0.41027	0.76745	FALSE
hsa-miR-1289	0.202006	0	1.1867	0.76756	FALSE
hsa-miR-129-2-3p	0.202006	0	1.1867	0.76756	FALSE
hsa-miR-154-3p	0.202006	0	1.1867	0.76756	FALSE
hsa-miR-26a-2-3p	0.202006	0	1.1867	0.76756	FALSE
hsa-miR-29b-1-5p	0.202006	0	1.1867	0.76756	FALSE
hsa-miR-3136-5p	0.202006	0	1.1867	0.76756	FALSE
hsa-miR-3146	0.202006	0	1.1867	0.76756	FALSE
hsa-miR-3173-3p	0.202006	0	1.1867	0.76756	FALSE
hsa-miR-3190-5p	0.202006	0	1.1867	0.76756	FALSE
hsa-miR-3191-3p	0.202006	0	1.1867	0.76756	FALSE
hsa-miR-33a-3p	0.202006	0	1.1867	0.76756	FALSE
hsa-miR-362-3p	0.202006	0	1.1867	0.76756	FALSE
hsa-miR-3680-5p	0.202006	0	1.1867	0.76756	FALSE
hsa-miR-371a-5p	0.202006	0	1.1867	0.76756	FALSE
hsa-miR-371b-3p	0.202006	0	1.1867	0.76756	FALSE
hsa-miR-376a-3p	0.202006	0	1.1867	0.76756	FALSE
hsa-miR-4449	0.202006	0	1.1867	0.76756	FALSE
hsa-miR-4474-3p	0.202006	0	1.1867	0.76756	FALSE
hsa-miR-4665-5p	0.202006	0	1.1867	0.76756	FALSE
hsa-miR-4676-3p	0.202006	0	1.1867	0.76756	FALSE
hsa-miR-4731-5p	0.202006	0	1.1867	0.76756	FALSE
hsa-miR-4744	0.202006	0	1.1867	0.76756	FALSE
hsa-miR-4748	0.202006	0	1.1867	0.76756	FALSE
hsa-miR-4754	0.202006	0	1.1867	0.76756	FALSE
hsa-miR-4777-3p	0.202006	0	1.1867	0.76756	FALSE
hsa-miR-4787-3p	0.202006	0	1.1867	0.76756	FALSE
hsa-miR-4797-5p	0.202006	0	1.1867	0.76756	FALSE
hsa-miR-4999-5p	0.202006	0	1.1867	0.76756	FALSE
hsa-miR-502-5p	0.202006	0	1.1867	0.76756	FALSE
hsa-miR-5189-3p	0.202006	0	1.1867	0.76756	FALSE
hsa-miR-520f-3p	0.202006	0	1.1867	0.76756	FALSE
hsa-miR-526b-5p	0.202006	0	1.1867	0.76756	FALSE
hsa-miR-542-5p	0.202006	0	1.1867	0.76756	FALSE
hsa-miR-5696	0.202006	0	1.1867	0.76756	FALSE
hsa-miR-616-5p	0.202006	0	1.1867	0.76756	FALSE
hsa-miR-6503-5p	0.202006	0	1.1867	0.76756	FALSE
hsa-miR-6755-5p	0.202006	0	1.1867	0.76756	FALSE
hsa-miR-6777-5p	0.202006	0	1.1867	0.76756	FALSE
hsa-miR-6800-5p	0.202006	0	1.1867	0.76756	FALSE
hsa-miR-6808-3p	0.202006	0	1.1867	0.76756	FALSE
hsa-miR-6819-3p	0.202006	0	1.1867	0.76756	FALSE
hsa-miR-6834-5p	0.202006	0	1.1867	0.76756	FALSE
hsa-miR-7849-3p	0.202006	0	1.1867	0.76756	FALSE
hsa-miR-516a-5p	2.30498	3.92937	-0.63278	0.76951	FALSE
hsa-miR-126-5p	453.581	575.026	-0.345	0.76952	FALSE
hsa-miR-3150a-5p	0.50861	1.50801	-0.95042	0.77077	FALSE
hsa-miR-3150b-3p	0.50861	1.50801	-0.95042	0.77077	FALSE
hsa-let-7i-5p	38652.7	31072	0.31499	0.77081	FALSE
hsa-miR-3184-3p	15127.6	12029.3	0.33071	0.77219	FALSE
hsa-miR-423-5p	15127.7	12029.3	0.33072	0.77219	FALSE
hsa-miR-4326	28.8331	37.9605	-0.35016	0.77371	FALSE
hsa-let-7i-3p	5.09398	3.16547	0.6534	0.77437	FALSE
hsa-miR-375-3p	35.9813	44.7998	-0.35227	0.77606	FALSE
hsa-miR-103a-2-5p	0	0.263789	-1.146	0.77841	FALSE
hsa-miR-10401-3p	0	0.263789	-1.146	0.77841	FALSE
hsa-miR-1229-5p	0	0.575015	-1.146	0.77841	FALSE
hsa-miR-124-5p	0	0.263789	-1.146	0.77841	FALSE
hsa-miR-138-1-3p	0	0.263789	-1.146	0.77841	FALSE
hsa-miR-1909-3p	0	0.263789	-1.146	0.77841	FALSE
hsa-miR-1910-5p	0	0.575015	-1.146	0.77841	FALSE
hsa-miR-219a-5p	0	0.263789	-1.146	0.77841	FALSE
hsa-miR-219b-3p	0	0.263789	-1.146	0.77841	FALSE
hsa-miR-29a-5p	0	0.575015	-1.146	0.77841	FALSE
hsa-miR-3115	0	0.263789	-1.146	0.77841	FALSE
hsa-miR-3148	0	0.311054	-1.146	0.77841	FALSE
hsa-miR-3174	0	0.263789	-1.146	0.77841	FALSE
hsa-miR-3191-5p	0	0.311054	-1.146	0.77841	FALSE
hsa-miR-3198	0	0.263789	-1.146	0.77841	FALSE
hsa-miR-3691-3p	0	0.575015	-1.146	0.77841	FALSE
hsa-miR-4470	0	0.263789	-1.146	0.77841	FALSE
hsa-miR-4485-3p	0	0.263789	-1.146	0.77841	FALSE
hsa-miR-4525	0	0.263789	-1.146	0.77841	FALSE
hsa-miR-4679	0	0.263789	-1.146	0.77841	FALSE
hsa-miR-4687-3p	0	0.263789	-1.146	0.77841	FALSE
hsa-miR-4688	0	0.263789	-1.146	0.77841	FALSE
hsa-miR-4728-3p	0	0.263789	-1.146	0.77841	FALSE
hsa-miR-4738-3p	0	0.263789	-1.146	0.77841	FALSE
hsa-miR-4767	0	0.263789	-1.146	0.77841	FALSE
hsa-miR-485-3p	0	0.263789	-1.146	0.77841	FALSE
hsa-miR-487b-5p	0	0.263789	-1.146	0.77841	FALSE
hsa-miR-508-3p	0	0.263789	-1.146	0.77841	FALSE
hsa-miR-5187-5p	0	0.263789	-1.146	0.77841	FALSE
hsa-miR-5188	0	0.575015	-1.146	0.77841	FALSE
hsa-miR-518f-5p	0	0.263789	-1.146	0.77841	FALSE
hsa-miR-520g-3p	0	0.263789	-1.146	0.77841	FALSE
hsa-miR-552-5p	0	0.575015	-1.146	0.77841	FALSE
hsa-miR-5581-3p	0	0.263789	-1.146	0.77841	FALSE
hsa-miR-5691	0	0.263789	-1.146	0.77841	FALSE
hsa-miR-577	0	0.575015	-1.146	0.77841	FALSE
hsa-miR-6504-5p	0	0.263789	-1.146	0.77841	FALSE
hsa-miR-653-5p	0	0.575015	-1.146	0.77841	FALSE
hsa-miR-6718-5p	0	0.263789	-1.146	0.77841	FALSE
hsa-miR-6756-5p	0	0.263789	-1.146	0.77841	FALSE
hsa-miR-6765-5p	0	0.263789	-1.146	0.77841	FALSE
hsa-miR-6777-3p	0	0.263789	-1.146	0.77841	FALSE
hsa-miR-6783-3p	0	0.263789	-1.146	0.77841	FALSE
hsa-miR-6820-3p	0	0.263789	-1.146	0.77841	FALSE
hsa-miR-6847-5p	0	0.263789	-1.146	0.77841	FALSE
hsa-miR-6895-5p	0	0.263789	-1.146	0.77841	FALSE
hsa-miR-7155-3p	0	0.263789	-1.146	0.77841	FALSE
hsa-miR-873-3p	0	0.263789	-1.146	0.77841	FALSE
hsa-miR-935	0	0.575015	-1.146	0.77841	FALSE
hsa-miR-944	0	0.575015	-1.146	0.77841	FALSE
novel_525	0	0.263789	-1.146	0.77841	FALSE
hsa-miR-185-3p	13.0191	10.2056	0.39512	0.77876	FALSE
hsa-miR-27b-3p	2399.12	2970.8	-0.30909	0.77886	FALSE
hsa-miR-3678-3p	0.101003	0.622109	-1.1165	0.77992	FALSE
novel_300	0.101003	0.622109	-1.1165	0.77992	FALSE
hsa-miR-1226-5p	0.541079	0.263789	1.1141	0.78005	FALSE
hsa-miR-1276	0.541079	0.263789	1.1141	0.78005	FALSE
hsa-miR-30b-3p	3.88496	6.05949	-0.5028	0.78081	FALSE
hsa-miR-2110	63.3424	79.0505	-0.30359	0.78118	FALSE
hsa-miR-142-5p	2873.79	3475.29	-0.27393	0.784	FALSE
hsa-miR-4433a-5p	218.135	295.647	-0.43521	0.78761	FALSE
hsa-miR-22-3p	2716.75	2231.91	0.28355	0.78958	FALSE
hsa-miR-337-5p	0.505015	0.575015	1.0608	0.79039	FALSE
hsa-miR-4435	0.505015	0.311054	1.0608	0.79039	FALSE
hsa-miR-29c-3p	12.2837	16.6338	-0.40576	0.79189	FALSE
hsa-miR-495-3p	33.9525	26.9278	0.35018	0.79423	FALSE
hsa-miR-130b-5p	25.9162	30.2644	-0.30424	0.79593	FALSE
hsa-miR-6815-5p	0.404012	1.31894	-0.95526	0.79915	FALSE
hsa-miR-1306-5p	1.01003	2.25262	-0.7047	0.80129	FALSE
hsa-miR-363-5p	6.43532	9.54384	-0.47332	0.80132	FALSE
hsa-miR-212-5p	4.67849	3.44906	0.51571	0.80237	FALSE
hsa-miR-137-3p	0.169537	0	1.0056	0.80258	FALSE
hsa-miR-320e	0.169537	0	1.0056	0.80258	FALSE
hsa-miR-4689	0.169537	0	1.0056	0.80258	FALSE
hsa-miR-488-5p	0.169537	0	1.0056	0.80258	FALSE
hsa-miR-518e-3p	0.169537	0	1.0056	0.80258	FALSE
hsa-miR-4433b-3p	223.344	295.647	-0.40123	0.80387	FALSE
hsa-miR-4755-3p	0.844088	0.527578	0.91843	0.80407	FALSE
hsa-miR-4755-5p	0.844088	0.527578	0.91843	0.80407	FALSE
hsa-miR-1296-5p	0.472546	0.263789	0.98736	0.80467	FALSE
hsa-miR-3620-5p	1.69537	1.14969	0.7164	0.80762	FALSE
hsa-miR-184	33.318	25.6576	0.32206	0.81068	FALSE
hsa-miR-4667-5p	1.01722	2.17738	-0.74486	0.81088	FALSE
hsa-miR-4635	0.101003	0.527578	-0.95809	0.81091	FALSE
hsa-miR-6781-5p	0.101003	0.527578	-0.95809	0.81091	FALSE
hsa-miR-1294	10.4609	8.88695	0.3397	0.81217	FALSE
hsa-miR-7113-5p	0.808024	1.81906	-0.70877	0.81235	FALSE
hsa-miR-106a-3p	0.606018	1.58273	-0.81964	0.81292	FALSE
hsa-miR-4742-3p	0.606018	1.58273	-0.81964	0.81292	FALSE
hsa-miR-744-5p	625.811	740.132	-0.24133	0.81292	FALSE
hsa-miR-134-5p	41.1096	49.6555	-0.2821	0.81318	FALSE
hsa-miR-6780a-5p	2.9074	4.42949	-0.45819	0.81455	FALSE
hsa-miR-135b-5p	0.981156	0.838804	0.72455	0.81537	FALSE
hsa-miR-941	110.659	95.1893	0.22028	0.81735	FALSE
hsa-miR-200a-5p	23.6453	17.1179	0.38824	0.81773	FALSE
hsa-miR-223-5p	625.484	739.503	-0.2414	0.82171	FALSE
hsa-miR-92a-3p	2680.6	3211.21	-0.26082	0.82327	FALSE
hsa-miR-483-3p	0.847683	1.84652	-0.71922	0.82564	FALSE
hsa-miR-124-3p	1.08216	0.791367	0.7271	0.82588	FALSE
hsa-miR-138-5p	0.202006	0.791367	-0.86994	0.82602	FALSE
hsa-miR-3675-5p	0.202006	0.791367	-0.86994	0.82602	FALSE
hsa-miR-589-3p	0.202006	0.791367	-0.86994	0.82602	FALSE
hsa-miR-136-5p	6.73879	5.36282	0.34038	0.8267	FALSE
hsa-miR-203a-3p	166.492	125.673	0.39737	0.82836	FALSE
hsa-miR-203b-5p	166.492	125.673	0.39737	0.82836	FALSE
hsa-miR-365a-5p	4.50536	3.4216	0.47758	0.8294	FALSE
hsa-miR-2115-5p	0.404012	0.263789	0.84587	0.83235	FALSE
hsa-miR-6877-5p	0.404012	0.263789	0.84587	0.83235	FALSE
hsa-miR-21-5p	40074.2	33992.1	0.23742	0.83289	FALSE
hsa-miR-3176	1.11103	0.791367	0.76976	0.83331	FALSE
hsa-miR-191-5p	4540.6	3942.56	0.20357	0.83334	FALSE
hsa-miR-99b-3p	42.685	51.5894	-0.24024	0.83426	FALSE
hsa-miR-181a-3p	32.8191	38.4263	-0.23655	0.83448	FALSE
hsa-miR-379-5p	77.5174	90.5998	-0.22756	0.83501	FALSE
hsa-miR-16-2-3p	1128.21	948.392	0.25116	0.83577	FALSE
hsa-miR-500a-3p	49.1873	41.9663	0.25411	0.83921	FALSE
hsa-miR-146b-5p	5142.66	4415.92	0.2201	0.83973	FALSE
hsa-miR-4508	5.21655	6.44595	-0.30649	0.84127	FALSE
hsa-miR-101-3p	3622.7	4295.83	-0.24643	0.84154	FALSE
hsa-miR-181a-5p	2013.04	2296.45	-0.18971	0.84215	FALSE
hsa-miR-512-3p	1.38876	1.05516	0.60155	0.84334	FALSE
hsa-miR-378c	35.2811	40.0294	-0.21197	0.84578	FALSE
hsa-miR-511-5p	86.5612	69.1518	0.33257	0.84663	FALSE
hsa-miR-28-5p	69.6468	80.0047	-0.20232	0.84801	FALSE
hsa-miR-31-5p	9.92565	7.47519	0.36419	0.84813	FALSE
hsa-miR-576-5p	9.48094	7.31136	0.34903	0.85004	FALSE
hsa-let-7a-5p	12847.3	14637.6	-0.18822	0.85117	FALSE
hsa-miR-147b-3p	1.92625	2.94911	-0.42097	0.85176	FALSE
hsa-miR-26b-5p	2931.65	2563.05	0.19407	0.85216	FALSE
hsa-miR-27a-3p	2946.1	3346.64	-0.18415	0.85397	FALSE
hsa-miR-1273h-3p	23.0841	20.4052	0.20876	0.8552	FALSE
hsa-miR-11400	13.1772	11.1462	0.29638	0.85958	FALSE
hsa-miR-18a-3p	6.20501	8.12425	-0.33751	0.85964	FALSE
hsa-miR-95-3p	92.623	79.2215	0.20217	0.86251	FALSE
hsa-miR-4795-5p	0.678147	0.527578	0.68239	0.86286	FALSE
hsa-miR-548ab	0.303009	0.885898	-0.64615	0.86875	FALSE
hsa-miR-212-3p	1.76088	0.527578	0.53727	0.86916	FALSE
hsa-miR-139-3p	73.6102	65.0529	0.19297	0.86986	FALSE
hsa-miR-3940-3p	0.404012	1.05516	-0.6381	0.87043	FALSE
hsa-miR-887-3p	0.404012	1.05516	-0.6381	0.87043	FALSE
hsa-miR-1185-2-3p	0.101003	0	0.65482	0.8712	FALSE
hsa-miR-1197	0.101003	0	0.65482	0.8712	FALSE
hsa-miR-1226-3p	0.101003	0	0.65482	0.8712	FALSE
hsa-miR-1256	0.101003	0	0.65482	0.8712	FALSE
hsa-miR-130a-5p	0.101003	0	0.65482	0.8712	FALSE
hsa-miR-133a-5p	0.101003	0	0.65482	0.8712	FALSE
hsa-miR-190a-3p	0.101003	0	0.65482	0.8712	FALSE
hsa-miR-1914-3p	0.101003	0	0.65482	0.8712	FALSE
hsa-miR-194-3p	0.101003	0	0.65482	0.8712	FALSE
hsa-miR-1972	0.101003	0	0.65482	0.8712	FALSE
hsa-miR-2276-3p	0.101003	0	0.65482	0.8712	FALSE
hsa-miR-2278	0.101003	0	0.65482	0.8712	FALSE
hsa-miR-2355-5p	0.101003	0	0.65482	0.8712	FALSE
hsa-miR-3136-3p	0.101003	0	0.65482	0.8712	FALSE
hsa-miR-3140-3p	0.101003	0	0.65482	0.8712	FALSE
hsa-miR-3142	0.101003	0	0.65482	0.8712	FALSE
hsa-miR-3155a	0.101003	0	0.65482	0.8712	FALSE
hsa-miR-3160-3p	0.101003	0	0.65482	0.8712	FALSE
hsa-miR-3160-5p	0.101003	0	0.65482	0.8712	FALSE
hsa-miR-3175	0.101003	0	0.65482	0.8712	FALSE
hsa-miR-3180-5p	0.101003	0	0.65482	0.8712	FALSE
hsa-miR-3619-3p	0.101003	0	0.65482	0.8712	FALSE
hsa-miR-3667-5p	0.101003	0	0.65482	0.8712	FALSE
hsa-miR-3682-3p	0.101003	0	0.65482	0.8712	FALSE
hsa-miR-374c-5p	0.101003	0	0.65482	0.8712	FALSE
hsa-miR-3911	0.101003	0	0.65482	0.8712	FALSE
hsa-miR-3925-3p	0.101003	0	0.65482	0.8712	FALSE
hsa-miR-3927-5p	0.101003	0	0.65482	0.8712	FALSE
hsa-miR-3936	0.101003	0	0.65482	0.8712	FALSE
hsa-miR-3944-5p	0.101003	0	0.65482	0.8712	FALSE
hsa-miR-433-5p	0.101003	0	0.65482	0.8712	FALSE
hsa-miR-448	0.101003	0	0.65482	0.8712	FALSE
hsa-miR-4654	0.101003	0	0.65482	0.8712	FALSE
hsa-miR-4655-5p	0.101003	0	0.65482	0.8712	FALSE
hsa-miR-4697-3p	0.101003	0	0.65482	0.8712	FALSE
hsa-miR-4699-5p	0.101003	0	0.65482	0.8712	FALSE
hsa-miR-4741	0.101003	0	0.65482	0.8712	FALSE
hsa-miR-4774-5p	0.101003	0	0.65482	0.8712	FALSE
hsa-miR-4781-5p	0.101003	0	0.65482	0.8712	FALSE
hsa-miR-487a-3p	0.101003	0	0.65482	0.8712	FALSE
hsa-miR-5000-3p	0.101003	0	0.65482	0.8712	FALSE
hsa-miR-513b-5p	0.101003	0	0.65482	0.8712	FALSE
hsa-miR-545-3p	0.101003	0	0.65482	0.8712	FALSE
hsa-miR-548ag	0.101003	0	0.65482	0.8712	FALSE
hsa-miR-548au-5p	0.101003	0	0.65482	0.8712	FALSE
hsa-miR-548b-5p	0.101003	0	0.65482	0.8712	FALSE
hsa-miR-548c-5p	0.101003	0	0.65482	0.8712	FALSE
hsa-miR-548t-5p	0.101003	0	0.65482	0.8712	FALSE
hsa-miR-551b-5p	0.101003	0	0.65482	0.8712	FALSE
hsa-miR-556-3p	0.101003	0	0.65482	0.8712	FALSE
hsa-miR-5582-3p	0.101003	0	0.65482	0.8712	FALSE
hsa-miR-5697	0.101003	0	0.65482	0.8712	FALSE
hsa-miR-6500-3p	0.101003	0	0.65482	0.8712	FALSE
hsa-miR-6505-3p	0.101003	0	0.65482	0.8712	FALSE
hsa-miR-6509-3p	0.101003	0	0.65482	0.8712	FALSE
hsa-miR-6509-5p	0.101003	0	0.65482	0.8712	FALSE
hsa-miR-6511b-3p	0.101003	0	0.65482	0.8712	FALSE
hsa-miR-652-5p	0.101003	0	0.65482	0.8712	FALSE
hsa-miR-6764-3p	0.101003	0	0.65482	0.8712	FALSE
hsa-miR-6764-5p	0.101003	0	0.65482	0.8712	FALSE
hsa-miR-6767-5p	0.101003	0	0.65482	0.8712	FALSE
hsa-miR-6782-5p	0.101003	0	0.65482	0.8712	FALSE
hsa-miR-6818-5p	0.101003	0	0.65482	0.8712	FALSE
hsa-miR-6826-5p	0.101003	0	0.65482	0.8712	FALSE
hsa-miR-6827-5p	0.101003	0	0.65482	0.8712	FALSE
hsa-miR-6836-5p	0.101003	0	0.65482	0.8712	FALSE
hsa-miR-6865-5p	0.101003	0	0.65482	0.8712	FALSE
hsa-miR-7850-5p	0.101003	0	0.65482	0.8712	FALSE
hsa-miR-8072	0.101003	0	0.65482	0.8712	FALSE
hsa-miR-8485	0.101003	0	0.65482	0.8712	FALSE
hsa-miR-874-5p	0.101003	0	0.65482	0.8712	FALSE
hsa-miR-96-3p	0.101003	0	0.65482	0.8712	FALSE
hsa-miR-3615	322.762	288.171	0.16513	0.87174	FALSE
hsa-miR-29c-5p	33.9213	39.6961	-0.22196	0.87206	FALSE
hsa-miR-34a-5p	0.912622	0.791367	0.54793	0.87259	FALSE
hsa-miR-196b-5p	20.5618	17.7805	0.24208	0.8732	FALSE
hsa-miR-1288-3p	1.01003	1.86633	-0.50865	0.87327	FALSE
hsa-miR-130a-3p	24.5891	21.5135	0.19377	0.87386	FALSE
hsa-miR-378a-3p	630.877	564.564	0.15891	0.87448	FALSE
hsa-miR-5010-3p	0.606018	1.31894	-0.56088	0.8768	FALSE
hsa-miR-494-3p	19.447	17.8144	0.19282	0.87777	FALSE
hsa-miR-98-5p	373.741	329.211	0.18604	0.87849	FALSE
hsa-miR-3912-3p	3.55006	2.87507	0.33026	0.87948	FALSE
hsa-miR-125b-5p	354.005	316.571	0.15714	0.88078	FALSE
hsa-miR-301a-3p	0.606018	0.527578	0.58977	0.88138	FALSE
hsa-miR-3143	0.606018	0.527578	0.58977	0.88138	FALSE
hsa-miR-3187-3p	0.606018	0.527578	0.58977	0.88138	FALSE
hsa-miR-490-3p	0.606018	0.527578	0.58977	0.88138	FALSE
hsa-miR-181c-5p	0.876558	0.791367	0.51448	0.88227	FALSE
hsa-miR-320a-3p	6603.24	5954.22	0.14945	0.88281	FALSE
hsa-miR-185-5p	1980.63	1785.84	0.14967	0.88286	FALSE
hsa-miR-3614-5p	11.5177	10.4421	0.21863	0.8836	FALSE
hsa-miR-183-3p	0.303009	0.263789	0.57892	0.88501	FALSE
hsa-miR-378g	0.303009	0.263789	0.57892	0.88501	FALSE
hsa-miR-548aq-3p	0.303009	0.575015	0.57892	0.88501	FALSE
hsa-miR-548g-5p	0.303009	0.575015	0.57892	0.88501	FALSE
hsa-miR-6747-3p	0.303009	0.263789	0.57892	0.88501	FALSE
hsa-miR-675-3p	0.303009	0.263789	0.57892	0.88501	FALSE
hsa-miR-378d	9.437	11.2815	-0.18387	0.88583	FALSE
hsa-miR-30c-5p	1016.13	1117.1	-0.13666	0.88658	FALSE
novel_268	1.35629	2.30006	-0.42948	0.8872	FALSE
hsa-miR-454-5p	7.40371	7.83214	-0.22991	0.88815	FALSE
hsa-miR-411-5p	36.0114	31.0853	0.15678	0.89085	FALSE
hsa-miR-132-5p	28.656	33.751	-0.20924	0.8909	FALSE
hsa-miR-27b-5p	15.6053	14.4192	0.17166	0.89153	FALSE
hsa-miR-6805-5p	1.31304	2.11031	-0.41242	0.89159	FALSE
hsa-miR-30d-3p	4.1555	5.46535	-0.23169	0.89274	FALSE
hsa-miR-323a-3p	3.51702	4.61855	-0.26562	0.89457	FALSE
hsa-miR-548ac	0.303009	0.791367	-0.51595	0.89596	FALSE
hsa-miR-6783-5p	0.303009	0.791367	-0.51595	0.89596	FALSE
hsa-miR-3177-3p	4.80176	5.50445	-0.22911	0.89629	FALSE
hsa-miR-128-1-5p	0.202006	0.574843	-0.50749	0.89843	FALSE
hsa-miR-629-5p	272.453	250.092	0.12517	0.89856	FALSE
hsa-miR-636	0.707021	1.36638	-0.40698	0.89963	FALSE
hsa-miR-5695	2.52508	3.42926	-0.32977	0.90047	FALSE
hsa-miR-581	4.39415	3.66575	0.20604	0.90078	FALSE
hsa-miR-381-3p	149.576	136.11	0.1405	0.90151	FALSE
hsa-miR-107	392.396	352.279	0.1579	0.9019	FALSE
hsa-miR-574-5p	27.4623	29.1171	-0.17014	0.90243	FALSE
hsa-miR-379-3p	2.4679	2.44117	-0.28487	0.90394	FALSE
hsa-miR-345-5p	74.1314	67.6783	0.14251	0.90439	FALSE
hsa-miR-493-5p	26.6402	29.3613	-0.17272	0.90482	FALSE
hsa-miR-335-3p	28.4419	30.121	-0.15171	0.90505	FALSE
hsa-miR-9-5p	113.04	122.962	-0.12698	0.9055	FALSE
hsa-miR-197-3p	32.5605	27.8338	0.15341	0.90583	FALSE
hsa-miR-337-3p	1.04609	1.10259	0.3364	0.90782	FALSE
hsa-miR-885-3p	0.303009	0.838804	-0.45626	0.908	FALSE
hsa-miR-3127-5p	0.27054	0.263789	0.45741	0.90911	FALSE
hsa-miR-26a-5p	42834.2	39832.1	0.10483	0.91085	FALSE
hsa-miR-6721-5p	2.2659	2.11031	-0.29383	0.91106	FALSE
hsa-miR-3202	0.948686	1.55527	-0.33911	0.91156	FALSE
hsa-miR-1307-5p	9.39374	9.00997	0.15076	0.91214	FALSE
hsa-miR-505-5p	23.8402	22.0409	0.15815	0.91349	FALSE
hsa-miR-3679-5p	0.609613	0.622109	0.41889	0.91423	FALSE
hsa-miR-4685-3p	0.202006	0.527578	-0.4262	0.91473	FALSE
hsa-miR-520a-3p	0.202006	0.527578	-0.4262	0.91473	FALSE
hsa-miR-6516-3p	0.202006	0.527578	-0.4262	0.91473	FALSE
hsa-miR-1284	0.505015	0.527578	0.40963	0.91753	FALSE
hsa-miR-1285-5p	0.707021	0.838804	0.37293	0.91771	FALSE
hsa-miR-5699-5p	0.678147	1.24422	-0.37145	0.91892	FALSE
hsa-miR-421	19.0329	18.1129	0.11782	0.92134	FALSE
hsa-miR-4659a-3p	3.47793	2.77969	0.21366	0.92142	FALSE
hsa-miR-659-5p	9.63842	9.0755	0.16087	0.92168	FALSE
hsa-let-7g-5p	9453.05	8854.68	0.094365	0.92402	FALSE
hsa-miR-642a-3p	6.1286	5.7957	0.16885	0.92411	FALSE
hsa-miR-642b-5p	6.1286	5.7957	0.16885	0.92411	FALSE
hsa-miR-4659b-5p	2.4679	2.25211	-0.1898	0.93496	FALSE
hsa-miR-24-3p	3471.42	3286.63	0.079243	0.93516	FALSE
hsa-miR-501-3p	92.1118	98.8275	-0.089398	0.93575	FALSE
hsa-miR-671-5p	0.404012	0.838632	-0.30994	0.93586	FALSE
hsa-miR-3074-5p	3465.33	3283.01	0.0783	0.93593	FALSE
hsa-miR-4697-5p	1.01722	1.55527	-0.2651	0.93641	FALSE
hsa-miR-4714-5p	1.01003	1.05516	0.2786	0.93736	FALSE
hsa-miR-556-5p	3.47017	4.24043	-0.15514	0.9379	FALSE
hsa-miR-574-3p	39.0139	40.6399	-0.08097	0.93849	FALSE
hsa-miR-6859-5p	0.707021	0.791367	0.30126	0.93884	FALSE
hsa-miR-1976	0.101003	0.263789	-0.30696	0.93942	FALSE
hsa-miR-3942-5p	0.101003	0.263789	-0.30696	0.93942	FALSE
hsa-miR-4753-5p	0.101003	0.263789	-0.30696	0.93942	FALSE
hsa-miR-5001-3p	0.101003	0.263789	-0.30696	0.93942	FALSE
hsa-miR-6514-5p	0.101003	0.311054	-0.30696	0.93942	FALSE
hsa-miR-6816-3p	0.101003	0.263789	-0.30696	0.93942	FALSE
hsa-miR-6840-5p	0.101003	0.263789	-0.30696	0.93942	FALSE
hsa-miR-6857-3p	0.101003	0.263789	-0.30696	0.93942	FALSE
hsa-miR-6882-5p	0.101003	0.263789	-0.30696	0.93942	FALSE
hsa-miR-152-3p	128.723	136.623	-0.07731	0.94003	FALSE
hsa-let-7d-3p	172.35	180.234	-0.064209	0.94623	FALSE
hsa-miR-450b-5p	6.73879	6.58895	0.113	0.94965	FALSE
hsa-miR-6855-5p	2.36273	2.87422	-0.13171	0.95074	FALSE
hsa-let-7f-2-3p	1.21204	1.41382	0.17896	0.95288	FALSE
hsa-miR-92b-3p	20.5698	18.3037	0.075917	0.95292	FALSE
hsa-miR-487a-5p	0.303009	0.622109	-0.23058	0.95356	FALSE
hsa-miR-433-3p	8.50327	9.15263	-0.090928	0.95405	FALSE
hsa-miR-30a-5p	2227.63	2321.08	-0.060056	0.95414	FALSE
hsa-miR-20a-3p	0.202006	0.263789	0.22493	0.95532	FALSE
hsa-miR-4489	0.202006	0.263789	0.22493	0.95532	FALSE
hsa-miR-4664-3p	0.202006	0.575015	0.22493	0.95532	FALSE
hsa-miR-4690-3p	0.202006	0.263789	0.22493	0.95532	FALSE
hsa-miR-6770-5p	0.202006	0.311054	0.22493	0.95532	FALSE
novel_224	0.202006	0.263789	0.22493	0.95532	FALSE
hsa-miR-548bc	14.1389	14.6381	-0.069089	0.95726	FALSE
hsa-miR-548f-5p	14.1389	14.6381	-0.069089	0.95726	FALSE
hsa-miR-3064-5p	2.7781	2.15758	0.11661	0.95766	FALSE
hsa-let-7b-5p	13846.7	13369.3	0.050717	0.96099	FALSE
hsa-miR-24-1-5p	27.7248	26.8682	0.076614	0.96127	FALSE
hsa-miR-584-3p	1.51505	1.58273	0.14841	0.96203	FALSE
hsa-miR-4521	7.06823	6.32516	0.087491	0.96521	FALSE
hsa-miR-625-3p	64.9039	63.598	0.048176	0.96552	FALSE
hsa-miR-143-5p	0.707021	1.14986	-0.13388	0.96555	FALSE
hsa-miR-584-5p	239.626	247.985	-0.043193	0.96609	FALSE
hsa-miR-11401	16.1176	17.3954	-0.052382	0.96629	FALSE
hsa-miR-3913-3p	5.22688	5.34285	0.075988	0.96648	FALSE
hsa-miR-3913-5p	5.22688	5.34285	0.075988	0.96648	FALSE
hsa-miR-4732-3p	6.17197	7.04826	-0.071264	0.96818	FALSE
hsa-miR-10527-5p	6.28851	5.68188	0.047407	0.9777	FALSE
hsa-miR-141-3p	7.34654	6.41884	-0.045766	0.97921	FALSE
hsa-miR-127-5p	1.79637	2.25262	-0.060997	0.98019	FALSE
hsa-miR-25-3p	4394.92	4488.7	-0.030154	0.98021	FALSE
hsa-miR-873-5p	11.0775	10.2078	-0.039081	0.98132	FALSE
hsa-miR-374a-3p	22.495	22.7149	-0.033398	0.9814	FALSE
hsa-miR-1224-5p	0.573549	0.791367	0.080875	0.98267	FALSE
hsa-miR-20b-3p	0.303009	0.527578	-0.072213	0.98548	FALSE
hsa-miR-92a-1-5p	7.95801	8.23704	-0.023943	0.987	FALSE
hsa-miR-641	18.3108	19.4916	-0.018869	0.98765	FALSE
hsa-miR-6842-5p	1.28416	1.58273	-0.043683	0.98779	FALSE
hsa-let-7f-5p	11882.9	11770.9	0.013687	0.98912	FALSE
hsa-miR-199a-5p	384.598	381.712	0.012848	0.98939	FALSE
hsa-miR-135a-2-3p	0.169537	0.263789	0.043814	0.99131	FALSE
hsa-miR-4425	0.678147	0.933163	0.040855	0.99161	FALSE
hsa-miR-3691-5p	1.11103	1.41348	-0.02078	0.99448	FALSE
hsa-miR-4732-5p	18.0975	18.7884	-0.0065277	0.99679	FALSE
hsa-miR-532-5p	750.014	748.477	0.0038014	0.9968	FALSE
hsa-miR-23b-3p	131.309	130.63	-0.003548	0.99718	FALSE
hsa-miR-548am-3p	1.18316	1.46074	-0.0077716	0.99766	FALSE
hsa-miR-506-3p	0.339073	0.527578	0.0016062	0.99968	FALSE
hsa-miR-99a-5p	6798.61	6801.43	-0.00038036	0.99975	FALSE
hsa-miR-122-5p	78942.9	11181.9	2.8196	NA	NA
hsa-miR-122b-3p	78929.7	11177.2	2.82	NA	NA
hsa-miR-1246	129.573	1325.62	-3.3685	NA	NA
hsa-miR-146a-5p	14678.5	2211.5	2.7307	NA	NA
hsa-miR-205-5p	756.057	122.28	2.6283	NA	NA
hsa-miR-218-5p	481.586	2351.53	-2.2916	NA	NA
hsa-miR-222-3p	1109.82	3729.18	-1.7482	NA	NA
hsa-miR-320c	99.4773	46.4318	1.1127	NA	NA
hsa-miR-432-5p	21.132	43.2169	-1.0073	NA	NA
hsa-miR-4446-3p	22.5923	37.2598	-0.68537	NA	NA
hsa-miR-486-3p	10342.5	13604	-0.39531	NA	NA
hsa-miR-486-5p	10569.2	13718.9	-0.37617	NA	NA
hsa-miR-493-3p	93.3247	228.189	-1.2854	NA	NA
hsa-miR-503-5p	105.027	539.774	-2.38	NA	NA
hsa-miR-548o-3p	24.5487	91.636	-1.8766	NA	NA
hsa-miR-96-5p	147.436	20.0818	2.8848	NA	NA
novel_3	11.6192	16991.7	-10.552	NA	NA
novel_391	318.697	9.77525	5.0338	NA	NA
novel_464	951.111	11.5003	6.3764	NA	NA
